# Supplementary material
Source: ML conference proceedings conference paper supplement (https://openreview.net/forum?id=jdL6WB5jHZ)
Supplement: supplementary_material [file RLDP_full_paper.pdf › RLDP_ICLR 2/RLDP_full_paper.pdf]

# REGULARIZED LATENT DYNAMICS PREDICTION IS A STRONG BASELINE FOR BEHAVIORAL FOUNDATION MODELS

**Anonymous authors**

Paper under double-blind review

## ABSTRACT

Behavioral Foundation Models (BFMs) have been recently successful in producing agents with the capabilities to adapt to any unknown reward or task. In reality, these methods are only able to produce near-optimal policies for the reward functions that are in the span of some pre-existing *state features*, making the choice of state features crucial to the expressivity of the BFM. As a result, these BFMs have used a wide variety of complex objectives, often sensitive to environment coverage, to train task spanning features with different inductive properties. With this work, our aim is to examine the question: are these complex representation learning objectives necessary for zero-shot RL? Specifically, we revisit the objective of self-supervised next-state prediction in latent space for state feature learning, but observe that such an objective alone is prone to increasing state-feature similarity, and subsequently reducing span. We propose an approach, RLDP, that adds a simple regularization to maintain feature diversity and can match or surpass state-of-the-art complex representation learning methods for zero-shot RL. Furthermore, we demonstrate the prior approaches diverge in low-coverage scenarios where Regularized Latent Dynamics Prediction (RLDP) still succeeds.

## 1 INTRODUCTION

The reward hypothesis states that all goals and purposes can be understood as maximization of scalar reward signals. This principle has motivated development of RL algorithms that learn efficiently given a reward function. However, a large part of previous developments in RL focus on dealing with a single reward function or a small subset of reward functions. But with the recent focus on generalist agents, the generalization capabilities of RL to new tasks are being tested. Still, when compared to their supervised ML counterparts, RL lags behind in showing zero-shot generalization to new tasks in an environment.

Zero-shot reinforcement learning (RL) (Touati et al., 2023) is a problem setting where we learn an agent that can solve *any* task in the environment without any additional training or planning, after an initial pretraining phase. Zero-shot RL has significant practical potential in developing generalist agents with wide applicability. For instance, robotics applications, like robotic manipulation or drone navigation, often require agents to solve a wide variety of unknown tasks. A general-purpose household robot needs to possess the capability to flexibly adapt to various household chores without explicit training for each new task.

Behavioral foundation models, which are based on successor representations, have been shown to be promising for zero-shot RL (Touati et al., 2023; Agarwal et al., 2024). They are algorithms that output near-optimal policies for a wide class of reward functions without additional learning or training during test-time by pretraining on a dataset of reward-free interactions. BFMs work by a) learning a state representation  $\varphi : s \rightarrow \mathbb{R}^d$  and b) learning a space of policies parameterized by a latent vector  $z \in \mathbb{R}^d$  trained to be optimal for reward defined as  $r(s) = \varphi(s)^\top z$ . At test time given any reward function  $r^{test}(s)$ , the near-optimal policy  $\pi_{z_{r^{test}}}$  is obtained by projecting reward functions into the space of state-representations, and solving for  $z_{r^{test}}$  such that  $r^{test}(s) \approx \varphi(s)^\top z_{r^{test}}$ .

The success of modern zero-shot RL methods is often attributed to learning generalizable state-representations. State-of-the-art methods usually learn state representations that retain information suitable to represent successor measures under a wide class of policies. Successor measures are information rich objects that capture a policy’s state visitation in the environment given any starting state. Successor measures are usually learned for an explicitly defined class of policies (Agarwal et al., 2024) or implicitly by first defining a class of reward functions (Touati et al., 2023; Park et al., 2024) and considering optimal policies for those reward functions as the set of policies. The main insight behind predicting successor measure as a target for state representation learning is that representations sufficient to explain future state-visitation for a wide range of policies capture features that are relevant for sequential decision making under various reward functions.

Unfortunately, state representation learning by estimating successor measures requires iteratively applying Bellman evaluation backups or Bellman optimality backups, both of which are known to result in a variety of learning difficulties. They can suffer from various forms of bias (Thrun & Schwartz (2014); Fujimoto et al. (2019); Lu et al. (2018); Fu et al. (2019) and can suffer from feature collapse (Kumar et al., 2021) due to the instability inherent in bootstrapping in the function approximation regime. Using Bellman backups to learn a representation requires choosing a class of policies or a class of reward functions apriori. Choosing a policy that selects actions out of distribution to the offline dataset can lead to incorrect generalization and degenerate representations.

Latent dynamics learning is an alternative loss for learning the state representation that has the benefit that it is independent of the policy. However, using the learned latent dynamics model to obtain a policy at test time would require a policy training phase with model based RL algorithm, going against our objective of zero-shot RL. This work investigates the following question:

*Is latent next-state prediction enough to learn state features that enable performant zero-shot RL?*

Our investigation is inspired by the work of Fujimoto et al. (2025), which showed that using dynamics prediction losses as auxiliary losses boosted performance of a single-task RL agent. Our work differs by tackling a different setting – we present an empirical investigation of the simple latent dynamics prediction objective for learning representations suitable for zero-shot RL. Unlike the single task RL setting examined by Fujimoto et al. (2025), we find that in its naive form, this objective leads to a mild form of feature collapse where the representation of different states increase in similarity over training. This collapse results in poor zero-shot RL performance when evaluated on a number of downstream tasks. With a simple regularization to prevent collapse, we show that the representations learned are competitive and present a scalable alternative to representations learned via complex successor measure estimation methods for zero-shot RL. In summary, the contributions of this paper are as follows. 1. We investigate latent-dynamics prediction as a simple alternative to learning state features for zero-shot RL. We identify as well as mitigate feature collapse with learned representation plaguing latent dynamics prediction. 2. We show that our method remains competitive through an extensive empirical evaluation of representations for task generalization across a variety of domains, in online and offline RL setting, including a full humanoid embodiment with a large state-action space. 3. We show that the RLDP objective can learn performant policies in low-coverage settings where other methods fail.

## 2 RELATED WORK

**Unsupervised RL:** Unsupervised RL encompasses the class of algorithms that enable learning general-purpose skills and representations without relying on reward signal in the data. Works that have focused on intent or skill discovery have used diversity-driven objectives (Eysenbach et al., 2018; Achiam et al., 2018), maximizing mutual information (Warde-Farley et al. (2018), Eysenbach et al. (2018), Achiam et al. (2018), Eysenbach et al. (2022)) or minimizing the Wasserstein distance (Park et al. (2023)) between latents and the induced state-visitation distribution. These discovered skills can be used to compose optimal policies for several rewards. Our work, on the other hand, focuses on learning representations capable of producing optimal value functions for any arbitrary function reward specification.

Recent pre-training approaches (e.g., Ma et al. (2023); Nair et al.) borrow self-supervised techniques such as temporal contrastive objectives to extract embeddings from large-scale datasets (Grauman et al. (2022)) that can be fine-tuned for downstream control. However, these representations are

inherently tied to the behavior policies used during data collection. These policies are limited in their ability to capture the full spectrum of possible behaviors or to approximate Q-functions for any reward functions. HILP (Park et al. (2024)) goes beyond standard masked autoencoding approaches by using Hilbert-space representations to preserve temporal dynamics. Auxiliary objectives, which involve complementary predictive tasks to get richer semantic or temporal structures, have also been explored in previous works (Agarwal et al., 2021; Schwarzer et al., 2020). Although representations from auxiliary objectives can accelerate policy learning, a new policy still needs to be learned from scratch for each new reward function. Our work will also be using a self-supervised learning objective to extract state-representations to be tied with Successor Feature based BFM (Touati et al., 2023; Tirinzoni et al., 2025) to allow zero-shot policy learning for a wide-variety of tasks.

**Behavioral Foundation Models:** Behavioral Foundation Models deals with the class of approaches that can be used to train an RL agent in an unsupervised manner using task-agnostic reward-free offline transitions. During inference, BFMs can approximate the optimal policy for a wide class of unseen reward functions without any further training.

Forward-Backward representations (Touati & Ollivier (2021)) and PSM (Agarwal et al. (2024)) provide a robust framework for BFMs based on stationary distribution, on which several successive works are based. Fast Imitation with BFMs (Pirotta et al. (2023)) demonstrates the ability of successor-measure-based BFMs to imitate new behaviors from just a few demonstrations, while Sikchi et al. (2025) builds upon this by fine-tuning BFMs’ latent embedding space, yielding 10-40% improvement over their zero-shot performance in a few of episodes. Recent progress in imitation learning has led to the development of BFMs tailored for humanoid control tasks (Peng et al. (2022), Won et al. (2022), Luo et al. (2023), Tirinzoni et al. (2025)) which can produce diverse behaviors trained using human demonstration data. Our work provides a stable, robust state-representation learning objective that can be used to build successor feature based BFMs.

### 3 PRELIMINARIES

We consider a reward-free Markov Decision Process (MDP) (Puterman, 2014) which is defined as a tuple  $\mathcal{M} = (\mathcal{S}, \mathcal{A}, P, d_0, \gamma)$ , where  $\mathcal{S}$  and  $\mathcal{A}$  respectively denote the state and action spaces,  $P$  denotes the transition dynamics with  $P(s'|s, a)$  indicating the probability of transitioning from  $s$  to  $s'$  by taking action  $a$ ,  $d_0$  denotes the initial state distribution and  $\gamma \in (0, 1)$  specifies the discount factor. A policy  $\pi$  is a function  $\pi : \mathcal{S} \rightarrow \Delta(\mathcal{A})$  mapping a state  $s$  to probabilities of action in  $\mathcal{A}$ . We denote by  $\Pr(\cdot | s, a, \pi)$  and  $\mathbb{E}[\cdot | s, a, \pi]$  the probability and expectation operators under state-action sequences  $(s_t, a_t)_{t \geq 0}$  starting at  $(s, a)$  and following policy  $\pi$  with  $s_t \sim P(\cdot | s_{t-1}, a_{t-1})$  and  $a_t \sim \pi(\cdot | s_t)$ . Given any reward function  $r : \mathcal{S} \rightarrow \mathbb{R}$ , the Q-function of  $\pi$  for  $r$  is  $Q_r^\pi(s, a) := \sum_{t \geq 0} \gamma^t \mathbb{E}[r(s_{t+1}) | s, a, \pi]$ .

**Successor Feature based Behavioral Foundation Models:** A behavioral foundation model (BFM) is an abstraction of the MDP that is trained using reward-free unsupervised transitions. At test-time, they produce near-optimal policies for a large set of reward functions, without additional planning or learning *in a zero-shot manner*. In this work, we will look into BFMs based on successor features.

These BFMs consider the distribution of downstream rewards that can be linearly spanned by state features,  $\varphi : \mathcal{S} \rightarrow \mathcal{Z}$  i.e. are given by  $r_z = \varphi^T z$ . The Q-function for such rewards can be written as  $Q_z^\pi(s, a) = \mathbb{E}_\pi[\sum_t \varphi(s_t) | s, a] z$  where  $\psi(s, a, \pi) = \mathbb{E}_\pi[\sum_t \varphi(s_t) | s, a]$  is called successor features. If  $\pi_z$  is defined as the optimal policy for the reward  $r_z$  with  $Q_z(s, a)$  being the corresponding Q-function, the following fixed point exists,

$$\pi_z = \arg \max_a \psi(s, a, \pi_z) z \text{ or } \psi(s, a, z) z \quad (1)$$

BFMs consists of  $(\psi, \varphi, \pi)$  such that given any reward function and dataset  $\rho$ , the corresponding  $z$  can be extracted simply by solving the linear regression,  $\min_z \mathbb{E}_\rho[(\varphi^T z - r)^2] = (\varphi^T \varphi)^{-1} \varphi^T r$ . Naturally, BFMs depend on the choice of the state representations  $\varphi$ . Recent works (Touati et al., 2023; Agarwal et al., 2024) have shown that  $\psi$  and  $\varphi$  can be jointly obtained by predicting *successor measures*.

The *successor measure* (Dayan, 1993; Blier et al., 2021) of state-action  $(s, a)$  under a policy  $\pi$  is the (discounted) distribution over future states obtained by taking action  $a$  in state  $s$  and following policy  $\pi$  thereafter:

$$M^\pi(s, a, X) := \sum_{t \geq 0} \gamma^t \Pr(s_{t+1} \in X \mid s, a, \pi) \quad \forall X \subset \mathcal{S}. \quad (2)$$

Using successor measures,  $Q$  functions can be represented as,  $Q^\pi(s, a) = \sum_{s^+} M^\pi(s, a, s^+) r(s^+)$ . This simple linear relationship between  $Q$  functions and Successor Measures is similar to that of successor features and has been exploited by recent works (Touati & Ollivier, 2021; Agarwal et al., 2024; Park et al., 2024) to train BFMs.

It has been shown by Touati & Ollivier (2021) that parameterizing the successor measures as  $M^{\pi_z}(s, a, s^+) = \psi^\pi(s, a, z)^\top \phi(s^+)$  yields  $\psi(s, a, z)$  as state features for the state feature  $\varphi(s) = (\phi \phi^\top)^{-1} \phi(s)$  (Theorem 12 of Touati & Ollivier (2021)). Since, the closed form solution for  $z$  for any reward function  $r$  was  $(\varphi \varphi^\top)^{-1} \varphi r$ , using the parameterization of  $M^\pi$  implies  $z = \phi r$ .

To train BFM, we alternate between a successor measure learning phase and a policy improvement phase. The successor measure learning phase learns to model densities  $M^{\pi_z}(s, a, s^+)$  using the contrastive objective (Blie et al., 2021):

$$\begin{aligned} \text{Successor-measure estimation: } \mathcal{L}_{SM}(M^{\pi_z}) &= -\mathbb{E}_{s, a, s' \sim \rho} [M^{\pi_z}(s, a, s')] \\ &+ \frac{1}{2} \mathbb{E}_{s, a, s' \sim \rho, s^+ \sim \rho} [(M^{\pi_z}(s, a, s^+) - \gamma \bar{M}^{\pi_z}(s', \pi_z(s'), s^+))^2]. \end{aligned} \quad (3)$$

For any reward function in  $\mathcal{T}$ , the policy improvement step greedily optimizes the corresponding  $Q$ -function:

$$\begin{aligned} \pi_z(s) &= \arg \max_a Q^{\pi_z}(s, a) = \arg \max_a \sum_{s^+} M_z^\pi(s, a, s^+) \cdot r(s^+) \\ &= \arg \max_a \sum_{s^+} [\psi(s, a, z)^\top (\phi(s^+) \cdot r(s^+))] \\ &= \arg \max_a \psi(s, a, z)^\top \sum_{s^+} \phi(s^+) \cdot r(s^+) = \arg \max_a \psi(s, a, z)^\top z \end{aligned} \quad (4)$$

The policy improvement step then equivalently minimizes the below loss function:

$$\text{Policy Improvement: } \mathcal{L}_P(\pi_z) = -\mathbb{E}_{a \sim \pi_z(s)} [\psi(s, a, z)^\top z] \quad (5)$$

A brief overview of various approaches to train BFMs can be found in appendix A.2. In this work we present a new approach to estimate state representations  $\phi$  enabling performant zero-shot RL.

## 4 METHOD

This method can be broadly divided into two parts — representation learning and zero-shot RL using successor features. The state representation encoder is trained using latent dynamics prediction with diversity regularization. We will show that these representations lead to a reduction in the prediction error for successor measures for any policy. Leveraging these robust state embeddings, we then pretrain a Behavioral Foundation Model (BFM) to predict successor measures, enabling zero-shot inference of near-optimal policies for unseen reward functions. We refer to this method as RLDP (Regularized Latent Dynamics Prediction based Behavioral Foundation Policies).

### 4.1 LEARNING REPRESENTATIONS WITH REGULARIZED LATENT DYNAMICS PREDICTION

Zero-shot RL based on successor features relies on learning a state representation denoted by  $\phi(s)$ . This state representation will define the span of reward functions that the zero-shot RL method is guaranteed to output optimal policies for.

The primary representation learning objective is – unrolled latent dynamics prediction. We learn a state representation encoder  $\phi : \mathcal{S} \rightarrow \mathbb{R}^d$ , ( $\mathcal{Z} = \mathbb{R}^d$ ) and a latent state-action representation encoder  $g : \mathbb{R}^d \times \mathcal{A} \rightarrow \mathbb{R}^d$  such that latent dynamics can be expressed as  $\phi(s') = g(\phi(s), a)^\top \mathbf{w}$  with some constant weights  $\mathbf{w}$ , informing our loss function for representation learning. A sub-sequence of horizon  $H$  is sampled from the offline interaction dataset  $\rho$  given by  $\tau^i = \{s_0^i, a_0^i, s_1^i, a_1^i, \dots, s_{H-1}^i, a_{H-1}^i, s_H^i\}$ . A sequence of future latent states  $h_{1:H}^i$  are obtained by

encoding the initial state  $h_0^i = \phi(s_0^i)$  and unrolling using the defined dynamics model  $h_{t+1}^i = g(h_t^i, a_t)^\top \mathbf{w}$ . Then the objective is to predict the encoded future latent states:

$$\mathcal{L}_d(\phi, g) = \mathbb{E}_{\tau^i \sim d^O} \left[ \left\| \sum_{t=1}^H h_t^i - \bar{\phi}(s_t^i) \right\|^2 \right], \quad (6)$$

where  $\tau^i = \{s_0^i, a_0^i, s_1^i, a_1^i, \dots, s_{H-1}^i, a_{H-1}^i, s_H^i\}$ ,  $h_0^i = \phi(s_0^i)$ , model  $h_{t+1}^i = g(h_t^i, a_t^i)^\top \mathbf{w}$  and  $\bar{\phi}$  is the slowly moving encoder target.

Latent dynamics models have been shown to significantly improve sample efficiency for single task RL when models are used for planning (Hansen et al., 2022), learning (Hafner et al., 2020), or as representations (Fujimoto et al., 2025) for model-free RL, but their suitability as general-purpose representations for multi-task and zero-shot RL remains understudied. Most successful methods (Touati & Ollivier, 2021; Agarwal et al., 2024) for zero-shot RL train representations to predict successor measures. However, directly estimating successor measures require learning future state-occupancies under a predefined set of policies. This poses a problem in the low-coverage setting as Bellman backups with policies that choose out of distribution action will result in incorrect predictions and negatively affect representation learning. In contrast, latent dynamics prediction is a policy-independent representation learning objective.

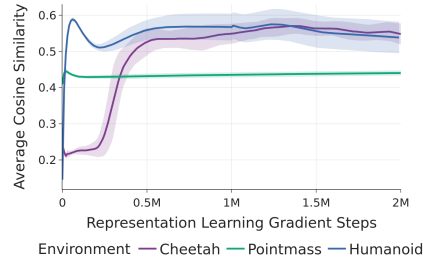

**Figure 1:** Average Cosine similarity between state-representations sampled uniformly from the training dataset: Feature similarity increases over the course of training. Shaded region shows standard deviation over 4 seeds

However, solely learning with the latent dynamics objective can lead to convergence to a collapsed solution. This is unsurprising as trivial solutions of predicting a constant zero vector achieves a perfect loss in Equation 6. To combat this, prior works (Grill et al., 2020) have proposed the use of a semi-gradient update where a stop-gradient is used for target  $h_{t+1}$  in Equation 6 along with a slowly updating target. However, we find these techniques insufficient to maintain representation diversity. We investigate this by computing the cosine similarity of state representations as a function of gradient steps trained via minimizing Eq 6 on an offline dataset collected by an exploration algorithm RND (Burda et al., 2019). Figure 1 shows that while the solutions do not collapse, there is an increase in feature similarity over the course of learning, which we refer to as a *mild* form of collapse. As the space of reward functions is spanned by state features, such an increase in feature similarity directly reduce the class of reward functions for which we can learn optimal policies and negatively impact task generalization.

**Mitigating collapse in latent dynamics prediction:** In order to prevent the mild form of feature collapse discussed earlier, we propose to add an auxiliary regularization objective that encourages diversity. Orthogonal regularization has been also studied in self-supervised learning (He et al., 2024; Bansal et al., 2018) as a way to mitigate collapse. We project all state representations  $\phi$  as well as state-action representations  $g(\phi(s), a)$  in a hypersphere:  $\mathbb{S}^{d-1} = \{x \in \mathbb{R}^d : \|x\|_2 = \sqrt{d}\}$  and regularize by minimizing cosine similarity between any two states. We ablate the choice of hyperspherical normalization on  $g$  in Appendix A.4.2 and observe it to give consistent improvements. We note that a similar regularization was applied to state features in the implementation of the prior unsupervised RL approach of Forward-Backward representations (Touati et al., 2023) to encourage solution identifiability and uniqueness; in the case of latent dynamics prediction this step becomes crucial to mitigate the increase in representation similarity. The orthogonal regularization loss takes the following form:

$$\mathcal{L}_r = \mathbb{E}_{s, s' \sim \rho} [\phi(s)^\top \phi(s')] \quad (7)$$

where  $\phi \in \mathbb{S}^{d-1}$ . Our final loss is a weighted combination of dynamics prediction combined with orthogonal diversity regularization:

$$\mathcal{L}_{RLDP} = \mathcal{L}_d + \lambda \mathcal{L}_r, \quad (8)$$

where  $\lambda$  controls the regularization strength. We evaluate the impact of orthogonality regularization in Appendix section A.4.2, and observe that adding a small regularization with coefficient  $\lambda = 0.01$  can prevent collapse.

**RLDP leads to representations capable of predicting successor measures:** The representation learning objective is simply latent dynamics prediction with an orthogonal regularization. Through this objective, we are enforcing the representations to be good for predicting successor measures, which forms the basis of the BFM that will be constructed using these. Lets begin by looking at the latent space MDP  $\bar{\mathcal{M}}$  defined using the state representation  $\phi$ .

**Definition 4.1.** Let MDP  $\bar{\mathcal{M}}$  corresponding to the state abstraction  $\phi : \mathcal{S} \rightarrow \mathcal{Z}$  be defined as  $\langle \phi(s), \mathcal{A}, P(\cdot|\phi(s), a), \gamma, r \rangle$ .

Apart from facilitating the construction of BFMs and zero-shot RL, one of the utilities of the state-representations is to compress the state space to a smaller space. MDP  $\bar{\mathcal{M}}$  represents this compression. We will assume that  $\bar{\mathcal{M}}$  is Lipschitz. Formally,

**Assumption 4.2.**  $\bar{\mathcal{M}}$  is  $(\mathcal{K}_R, \mathcal{K}_P)$  – Lipschitz.

We now have all the components to show that  $\mathcal{L}_{RLDP}$  leads to a reduction in the prediction error of successor measure for any  $\mathcal{K}_V$ -Lipschitz valued policy.

**Lemma 4.3.** Given MDP  $\bar{\mathcal{M}}$ , let  $\pi$  be any  $\mathcal{K}_V$ -Lipschitz valued policy,  $M^\pi$  be the successor measure for  $\pi$  and  $\bar{M}^\pi$  be the corresponding successor measure on  $\bar{\mathcal{M}}$ ,  $\mathcal{L}_{RLDP}$  upper bounds the prediction error in successor measure,

$$\mathbb{E}_{s,a \sim d^\pi, s^+ \sim \rho} [|M^\pi(s, a, s^+) - \bar{M}^\pi(\phi(s), a, \phi(s^+))|] \leq \frac{\mathcal{L}_{RLDP}}{1 - \gamma} \quad (9)$$

Lemma 4.3 implies that minimizing  $\mathcal{L}_{RLDP}$  will lead to reduction in prediction error for successor measures.

## 4.2 ZERO-SHOT RL WITH RLDP REPRESENTATIONS

With the obtained RLDP representations  $\phi$  learned using reward-free offline environment transitions, we train a successor measure based behavioral foundation model by alternating successor measure estimation and policy improvement. The RLDP representations are kept frozen in the successor measure parameterization  $M^{\pi_z}(s, a, s^+) = \psi^\pi(s, a, z)^\top \phi(s^+)$  and  $\psi(s, a, z)$  and  $\pi_z$  are trained using losses 10 and 5 respectively.

$$\begin{aligned} \mathcal{L}_{zsr1}(\psi) = & -\mathbb{E}_{s,a,s' \sim \rho} [\psi(s, a, z)\phi(s')] \\ & + \frac{1}{2} \mathbb{E}_{s,a,s' \sim \rho, s^+ \sim \rho} [(\psi(s, a, z)\phi(s^+) - \gamma \bar{\psi}(s', \pi_z(s'), z)\phi(s^+))^2] \end{aligned} \quad (10)$$

Following prior work, in our experiments we consider variations of the policy improvement step (Eq 5) where we use a expert regularization in the policy update (Tirinzoni et al., 2025) to guide exploration during online RL for high-dimensional state-action space or use a behavior cloning regularization (Fujimoto & Gu, 2021) when learning offline for low-coverage datasets. These modifications are discussed in detail in the next section. And we provide the full representation and policy learning pipeline for RLDP in appendix section 1.

## 5 EXPERIMENTS

The goal of our experiments is to perform an extensive empirical study of the suitability of state representations learned by a regularized latent next-state prediction objective when compared to other methods that employ more complex strategies. In particular, we aim to answer the following questions: (a) Keeping all other learning factors similar, how does our method compare to baselines in enabling generalization to unseen reward functions? We compare the representations learned by training multi-task policies with zero-shot RL both in the offline setting and the online setting. (b) Does the absence of explicit Bellman backups make RLDP a robust choice for low coverage datasets? (c) What design decisions are crucial to the success of our method? We perform several empirical ablations to understand our design choices.

For all datasets, we pretrain a BFM using the successor feature approach outlined in our method section 4. Each algorithm is given the same budget of gradient steps during pretraining, controlling the state representation dimension, and the final performance is obtained by taking the pre-trained model at the end and querying it for different task-rewards for 50 episodes. All results are aggregated across 4 seeds.

|           | Task          | Laplace             | FB                  | HILP                | PSM                 | RLDP                 |
|-----------|---------------|---------------------|---------------------|---------------------|---------------------|----------------------|
| Walker    | Stand         | 243.70±151.40       | <b>902.63±38.94</b> | 607.07±165.28       | <b>872.61±38.81</b> | <b>877.69±45.03</b>  |
|           | Run           | 63.65±31.02         | <b>392.76±31.29</b> | 107.84±34.24        | 351.50±19.46        | 324.85±54.57         |
|           | Walk          | 190.53±168.45       | <b>877.10±81.05</b> | 399.67±39.31        | <b>891.44±46.81</b> | 790.94±67.55         |
|           | Flip          | 48.73±17.66         | 206.22±162.27       | 277.95±59.63        | <b>640.75±31.88</b> | 491.64±37.30         |
| Cheetah   | Run           | 96.32±35.69         | <b>257.59±58.51</b> | 68.22±47.08         | <b>244.38±80.00</b> | <b>236.31±20.75</b>  |
|           | Run Backward  | 106.38±29.40        | <b>307.07±14.91</b> | 37.99±25.16         | <b>296.44±20.14</b> | <b>322.08±39.28</b>  |
|           | Walk          | 409.15±56.08        | 799.83±67.51        | 318.30±168.42       | <b>984.21±0.49</b>  | 895.31±49.84         |
|           | Walk Backward | 654.29±219.81       | <b>980.76±2.32</b>  | 349.61±236.29       | <b>979.01±7.73</b>  | <b>984.76±0.85</b>   |
| Quadruped | Stand         | <b>854.50±41.47</b> | 740.05±107.15       | 409.54±97.59        | <b>842.86±82.18</b> | 794.94±43.25         |
|           | Run           | <b>412.98±54.03</b> | <b>386.67±32.53</b> | 205.44±47.89        | <b>431.77±44.69</b> | <b>457.41±74.70</b>  |
|           | Walk          | 494.56±62.49        | <b>566.57±53.22</b> | 218.54±86.67        | <b>603.97±73.67</b> | 465.40±185.29        |
|           | Jump          | 642.84±114.15       | 581.28±107.38       | 325.51±93.06        | 596.37±94.23        | <b>733.32±55.30</b>  |
| Pointmass | Top Left      | 713.46±58.90        | 897.83±35.79        | <b>944.46±12.94</b> | 831.43±69.51        | 890.41±60.79         |
|           | Top Right     | 581.14±214.79       | 274.95±197.90       | 96.04±166.34        | 730.27±58.10        | <b>795.47±21.10</b>  |
|           | Bottom Left   | 689.05±37.08        | 517.23±302.63       | 192.34±177.48       | 451.38±73.46        | <b>805.17±20.44</b>  |
|           | Bottom Right  | 21.29±42.54         | 19.37±33.54         | 0.17±0.29           | <b>43.29±38.40</b>  | <b>193.38±167.63</b> |

**Table 1:** Comparison of zero-shot offline RL performance between different methods. Entries in **bold** are within one standard deviation of the per-task best mean (i.e.,  $\mu_i \geq \mu^* - \sigma^*$ ).

## 5.1 BENCHMARKING ZERO-SHOT RL FOR CONTINUOUS CONTROL

**Baselines:** We broadly compare RLDP against commonly used state-of-the-art baselines for zero-shot RL such as: FB, HILP, PSM, and Laplacian. These baselines represent a set of diverse and strong approaches in the area of zero-shot RL.

### 5.1.1 OFFLINE ZERO-SHOT RL

**Setup and Evaluation:** We consider continuous control tasks from DeepMind control suite (Tassa et al., 2018) – Pointmass, Cheetah, Walker, Quadruped under a similar setup considered by prior works in zero-shot RL. We use the ExoRL suite (Yarats et al. (2022)) for obtaining exploratory datasets using RND (Burda et al. (2019)). To evaluate the different zero-shot RL methods we take the pretrained policies and query them on a variety of tasks. For each environment, we consider 4 tasks similar to prior works (Touati et al., 2023; Park et al., 2024; Agarwal et al., 2024).

**Results:** We conduct our experiments across two axes: a) Table 1 compares against representation dimension for  $\phi$  found to be best for prior methods and RLDP with the same number of gradient updates for pretraining each BFM. b) Table 7 in the Appendix pretrains all the BFMs on same number of representation dimensions (512) and gradient steps. For RLDP, we use a encoding horizon of 5 and set the orthogonality regularization to 1. We train representations for 2 million steps and train policy for additional 3 million steps.

Overall, RLDP fares competitively to baselines that employ complex strategies such as FB, PSM to learn representation optimizing for successor measures across the environments despite its simplicity. Furthermore training FB and PSM baselines is sensitive to hyperparameters and we rely on author’s implementation to tune hyperparameters.

### 5.1.2 ONLINE ZERO-SHOT RL

Previous section validated that RLDP representations lead to competitive zero-shot RL when the learning policies use offline interaction data. We explore if the learned representation enable competitive multi-task learning when agent is allowed interaction with the environment.

**Setup, Algorithm, and Evaluation:** We consider the SMPL (Loper et al. (2023)) Humanoid environment that aims to mimic real human embodiment and provides a complex learning challenge with a 358 dimensional observation space and a 69 dimensional action space. Due to the exploratory challenge of the environment Tirinzoni et al. (2025) presented a new approach, Conditional Policy Regularization (CPR), to guide RL learning regularized with expert real-human trajectories. CPR trains successor measures in a similar way as Eq 3 but adds a regularization objective to policy encouraging it to jointly maximize  $Q$ -function while staying close to expert. This allows for better exploration and more realistic motions. Further implementation details can be found in appendix sections A.3.2, A.5.2.



Our representation learning phase is offline and we use the metamotivo 5M transition dataset<sup>1</sup> collected from replay buffer of an online RL agent to learn state-representations and then use the CPR approach to train zero-shot policies. We train representations for 2 million gradient steps and policy for 20 million environment steps. The offline phase of representations help us remove the exploration confounder and help test the quality of representation obtained by different approaches. The evaluation is performed on the full suite of 45 tasks provided by Tirinzoni et al. (2025). For each task, we present the normalized scores with respect to fully-online trained representations and policy in Fig 2 from Tirinzoni et al. (2025).

**Results:** Fig 2 suggests that overall RLDP fares competitively to the baselines. The performance is task dependent - on some tasks (such as raisearms and lieonground), RLDP outperforms the baselines, even beating the oracle performance for some tasks. In others (like crawl or rotate tasks), all methods perform subpar to oracle. Complete results for this evaluation are provided in table 9.

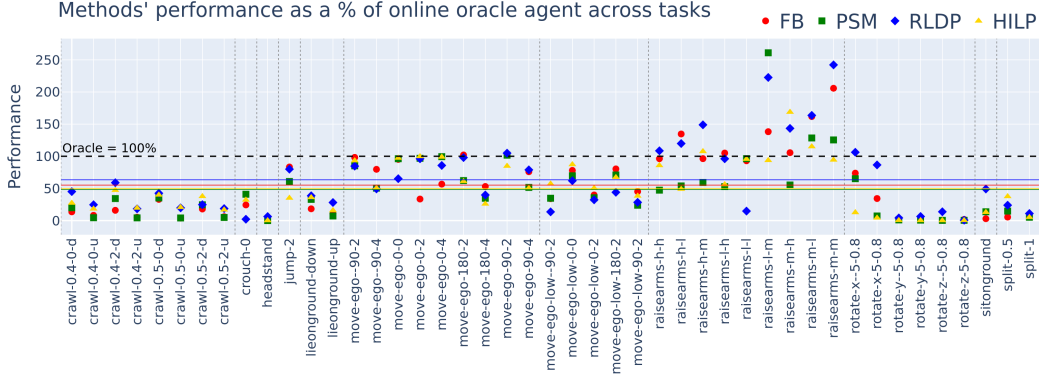

**Figure 2:** Evaluating offline representation learning methods using an online oracle policy in high dimensional 3D humanoid. Solid lines shows mean performance across tasks for each of the method.

## 5.2 LEARNING REPRESENTATIONS WITH LOW COVERAGE DATASETS

RLDP learns a policy-independent representation through latent dynamics prediction. Prior approaches assume a class of policies to learn representations predictive of successor measures,

| Task                         | FB          | PSM         | HILP              | RLDP               |
|------------------------------|-------------|-------------|-------------------|--------------------|
| halfcheetah-medium-expert-v2 | 55.46±7.75  | 63.93±5.95  | 62.53±6.64        | <b>88.55±6.31</b>  |
| halfcheetah-medium-v2        | 41.77±1.99  | 42.87±0.61  | 42.73±1.60        | <b>49.97±1.19</b>  |
| hopper-medium-expert-v2      | 49.93±28.78 | 1.50±0.53   | 62.69±6.67        | <b>75.53±12.70</b> |
| hopper-medium-v2             | 41.85±7.07  | 44.41±24.73 | <b>51.86±2.76</b> | 41.40±3.63         |
| walker2d-medium-expert-v2    | 36.85±14.90 | 71.75±43.63 | 84.83±19.45       | <b>101.30±3.92</b> |
| walker2d-medium-v2           | 59.31±16.47 | 63.87±14.35 | 50.43±16.78       | <b>84.66±2.98</b>  |

**Table 2:** Normalized returns comparing FB, PSM, HILP, and RLDP in low-coverage setting. RLDP shows significant gains over approaches that rely on explicit Bellman backups for representation learning. Table shows mean  $\pm$  std; **Boldface** results show statistically significant improvement with paired Wilcoxon signed-rank tests.

and this strategy can lead to poor out-of-distribution generalization when actions proposed by the policy are not covered by the dataset. **Setup.** To evaluate this hypothesis concretely, we consider the D4RL benchmark of OpenAI gym MuJoCo tasks (Fu et al. (2020), Todorov et al. (2012), Brockman et al. (2016)). This dataset has been widely used to examine the effects of value estimation error from out-of-distribution actions due to low coverage, which many offline RL algorithms struggle with (Kostrikov et al. (2021); Fujimoto & Gu (2021); Kumar et al. (2020); Wu et al. (2019); Sikchi et al. (2024b)). We consider halfcheetah, hopper, and walker2d domains, and medium and medium-expert datasets.

**Evaluation:** To evaluate the different zero-shot RL methods, we first pretrain the representation learning methods on these datasets for 1 million gradient steps. We use a modified zero-shot policy learning approach that alternates between Eq 3 and Eq 5 that is additionally augmented policy improvement loss with a behavioral regularization inspired by Fujimoto & Gu (2021). This regularization allow the RL approach to learn without overestimation bias and enabling us to establish a fair comparison among representations learned by different approaches. We use the corresponding reward function provided by each dataset to do reward inference and evaluate the zero-shot policy. Further details are provided in Appendix sections A.3.3, A.5.3.

<sup>1</sup><https://huggingface.co/facebook/metamotivo-M-1>



**Results:** For each task, the normalized scores are presented in table 2. RLDP outperforms in 5 out of 6 tasks, with statistically significant margins. Overall, the results suggest that RLDP is a reliable choice for feature learning in low coverage datasets while providing a simpler alternative to otherwise complex representation learning approaches.

### 5.3 WHAT MATTERS FOR SUPERVISING REPRESENTATIONS SUITABLE FOR CONTROL?

In section 4.1, we introduced RLDP method of representation learning with the loss used (equation 6, 7, 8) and the encoder training process (section 4.1). In this section, we aim to ablate components of this loss and the architecture of the encoder.

**Orthogonality regularization:** Keeping the encoding horizon constant ( $H = 5$ ), we change the orthogonality regularization coefficient. The results, presented in Figure 3, show that for zero regularization ( $\lambda = 0$ ), the average return decreases compared to  $\lambda > 0$ . This shows that diversity regularization is critical to the representation loss. For fixed encoding horizon, we see that orthogonality regularizer  $\lambda = 1$  performs best. To further understand the role of the orthogonality regularizer in representation learning and how it helps prevent feature collapse, we refer to Section 4.1 and Section A.4.2, where we look at the cosine similarity between representations.

**Encoder architecture:** In section 4.1, we introduce encoder training, where we project the state-action representations  $g(\phi(s), a)$  to a hypersphere. Here, we examine the impact of this projection by comparing it to a network where we do not perform spherical normalization on the state-action representations. The results are presented in table 3. We observe that RLDP consistently outperforms its variant without spherical normalization on most tasks (Results for all environments can be found in appendix table 6). The standard deviation is also higher for most results on the variant without hypersphere projection. This indicates that spherical normalization is an important design choice for stabilization and improving performance.

The complete encoder architecture is discussed in A.4 where we provide additional results for ablating encoder architecture.

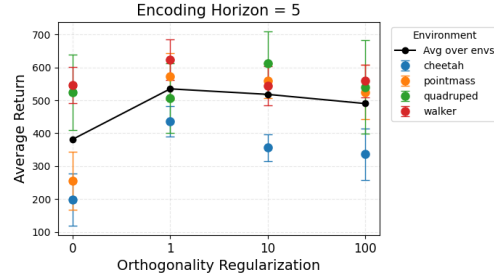

**Figure 3:** Evaluating the impact of Orthogonality Regularization: We ran one-sided Mann-Whitney U tests on the per-seed returns to compare different values of the orthogonality regularization, and we observe that orthogonality regularization (coefficient=1.0) gives a statistically significant improvement over coefficient=0.

## 6 CONCLUSION

This paper introduces RLDP, a representation learning objective for effective task generalization enabling performant behavioral foundation models. Our objective takes the simple form of regularized latent-dynamics prediction, an objective that does not require any reconstruction, making it able to handle high-dimensional observation space and does not require explicit Bellman backups, making it more amenable to optimization. We identify that simply using latent-dynamics prediction leads to a mild form of feature collapse where the state-representation similarity increases over time. To combat this issue, we propose using orthogonal regularization as a way to maintain feature diversity and prevent collapse. Using our method enables learning generalizable, stable, and robust representations that can achieve competitive performance compared to prior zero-shot RL techniques without relying on reinforcement-driven signals. Importantly, we show that prior approaches struggle in low coverage setting and RLDP works robustly across different dataset types, making it a practical unsupervised

|                  | Task         | RLDP                | RLDP w/o SN         |
|------------------|--------------|---------------------|---------------------|
| <b>Quadruped</b> | Stand        | <b>794.94±43.25</b> | 661.73±95.75        |
|                  | Run          | 457.41±74.70        | 378.97±148.47       |
|                  | Walk         | 465.40±185.29       | 519.39±251.11       |
|                  | Jump         | <b>733.32±55.30</b> | 495.98±133.81       |
|                  | Average(*)   | 612.77              | 514.02              |
| <b>Pointmass</b> | Top Left     | 890.41±60.79        | <b>892.13±41.74</b> |
|                  | Top Right    | 795.47±21.10        | 728.72±122.99       |
|                  | Bottom Left  | <b>805.17±20.44</b> | 683.12±76.22        |
|                  | Bottom Right | 193.38±167.63       | 22.54±39.04         |
|                  | Average(*)   | 671.11              | 515.02              |

**Table 3:** Study of encoder architecture (subset). Table shows mean  $\pm$  std; **boldface** indicates the highest mean per task. SN: Spherical Normalization on  $g$

learning approach. This work, thus, paves the way for simpler yet effective approaches to learn zero shot policies in behavioral foundation models.

## REFERENCES

- Joshua Achiam, Harrison Edwards, Dario Amodei, and Pieter Abbeel. Variational option discovery algorithms. *arXiv preprint arXiv:1807.10299*, 2018.
- Siddhant Agarwal, Aaron Courville, and Rishabh Agarwal. Behavior predictive representations for generalization in reinforcement learning. In *Deep RL Workshop NeurIPS 2021*, 2021. URL <https://openreview.net/forum?id=b5PJaxS6Jxg>.
- Siddhant Agarwal, Harshit Sikchi, Peter Stone, and Amy Zhang. Proto successor measure: Representing the space of all possible solutions of reinforcement learning. *arXiv preprint arXiv:2411.19418*, 2024.
- Nitin Bansal, Xiaohan Chen, and Zhangyang Wang. Can we gain more from orthogonality regularizations in training deep cnns? *CoRR*, abs/1810.09102, 2018. URL <http://arxiv.org/abs/1810.09102>.
- Léonard Blier, Corentin Tallec, and Yann Ollivier. Learning successor states and goal-dependent values: A mathematical viewpoint. *arXiv preprint arXiv:2101.07123*, 2021.
- Greg Brockman, Vicki Cheung, Ludwig Pettersson, Jonas Schneider, John Schulman, Jie Tang, and Wojciech Zaremba. Openai gym. 2016. eprint. *arXiv preprint arXiv:1606.01540*, 50, 2016.
- Yuri Burda, Harrison Edwards, Amos Storkey, and Oleg Klimov. Exploration by random network distillation. In *International Conference on Learning Representations*, 2019. URL <https://openreview.net/forum?id=H1lJJnR5Ym>.
- Peter Dayan. Improving generalization for temporal difference learning: The successor representation. *Neural computation*, 5(4):613–624, 1993.
- Benjamin Eysenbach, Abhishek Gupta, Julian Ibarz, and Sergey Levine. Diversity is all you need: Learning skills without a reward function. *arXiv preprint arXiv:1802.06070*, 2018.
- Benjamin Eysenbach, Ruslan Salakhutdinov, and Sergey Levine. The information geometry of unsupervised reinforcement learning. In *International Conference on Learning Representations*, 2022. URL <https://openreview.net/forum?id=3wU2UX0voE>.
- Justin Fu, Aviral Kumar, Matthew Soh, and Sergey Levine. Diagnosing bottlenecks in deep q-learning algorithms. In *International Conference on Machine Learning*, pp. 2021–2030. PMLR, 2019.
- Justin Fu, Aviral Kumar, Ofir Nachum, George Tucker, and Sergey Levine. D4rl: Datasets for deep data-driven reinforcement learning. *arXiv preprint arXiv:2004.07219*, 2020.
- Scott Fujimoto and Shixiang Shane Gu. A minimalist approach to offline reinforcement learning. *Advances in neural information processing systems*, 34:20132–20145, 2021.
- Scott Fujimoto, David Meger, and Doina Precup. Off-policy deep reinforcement learning without exploration. In *International conference on machine learning*, pp. 2052–2062. PMLR, 2019.
- Scott Fujimoto, Pierluca D’Oro, Amy Zhang, Yuandong Tian, and Michael Rabbat. Towards general-purpose model-free reinforcement learning. *arXiv preprint arXiv:2501.16142*, 2025.
- Kristen Grauman, Andrew Westbury, Eugene Byrne, Zachary Chavis, Antonino Furnari, Rohit Girdhar, Jackson Hamburger, Hao Jiang, Miao Liu, Xingyu Liu, et al. Ego4d: Around the world in 3,000 hours of egocentric video. In *Proceedings of the IEEE/CVF Conference on Computer Vision and Pattern Recognition*, pp. 18995–19012, 2022.

- Jean-Bastien Grill, Florian Strub, Florent Altché, Corentin Tallec, Pierre Richemond, Elena Buchatskaya, Carl Doersch, Bernardo Avila Pires, Zhaohan Guo, Mohammad Gheshlaghi Azar, et al. Bootstrap your own latent-a new approach to self-supervised learning. *Advances in neural information processing systems*, 33:21271–21284, 2020.
- Tuomas Haarnoja, Aurick Zhou, Pieter Abbeel, and Sergey Levine. Soft actor-critic: Off-policy maximum entropy deep reinforcement learning with a stochastic actor. In *International conference on machine learning*, pp. 1861–1870. Pmlr, 2018.
- Danijar Hafner, Timothy Lillicrap, Jimmy Ba, and Mohammad Norouzi. Dream to control: Learning behaviors by latent imagination. In *International Conference on Learning Representations*, 2020. URL <https://openreview.net/forum?id=S1l0TC4tDS>.
- Nicklas Hansen, Xiaolong Wang, and Hao Su. Temporal difference learning for model predictive control. *arXiv preprint arXiv:2203.04955*, 2022.
- Junlin He, Jinxiao Du, and Wei Ma. Preventing dimensional collapse in self-supervised learning via orthogonality regularization, 2024. URL <https://arxiv.org/abs/2411.00392>.
- Ilya Kostrikov, Ashvin Nair, and Sergey Levine. Offline reinforcement learning with implicit q-learning. *arXiv preprint arXiv:2110.06169*, 2021.
- Aviral Kumar, Aurick Zhou, George Tucker, and Sergey Levine. Conservative q-learning for offline reinforcement learning. *Advances in neural information processing systems*, 33:1179–1191, 2020.
- Aviral Kumar, Rishabh Agarwal, Tengyu Ma, Aaron Courville, George Tucker, and Sergey Levine. Dr3: Value-based deep reinforcement learning requires explicit regularization. *arXiv preprint arXiv:2112.04716*, 2021.
- Yitang Li, Zhengyi Luo, Tonghe Zhang, Cunxi Dai, Anssi Kanervisto, Andrea Tirinzoni, Haoyang Weng, Kris Kitani, Mateusz Guzek, Ahmed Touati, et al. Bfm-zero: A promptable behavioral foundation model for humanoid control using unsupervised reinforcement learning. *arXiv preprint arXiv:2511.04131*, 2025.
- Matthew Loper, Naureen Mahmood, Javier Romero, Gerard Pons-Moll, and Michael J Black. Smpl: A skinned multi-person linear model. In *Seminal Graphics Papers: Pushing the Boundaries, Volume 2*, pp. 851–866. 2023.
- Tyler Lu, Dale Schuurmans, and Craig Boutilier. Non-delusional q-learning and value-iteration. *Advances in neural information processing systems*, 31, 2018.
- Zhengyi Luo, Jinkun Cao, Josh Merel, Alexander Winkler, Jing Huang, Kris Kitani, and Weipeng Xu. Universal humanoid motion representations for physics-based control. *arXiv preprint arXiv:2310.04582*, 2023.
- Yecheng Jason Ma, Shagun Sodhani, Dinesh Jayaraman, Osbert Bastani, Vikash Kumar, and Amy Zhang. VIP: Towards universal visual reward and representation via value-implicit pre-training. In *The Eleventh International Conference on Learning Representations*, 2023. URL <https://openreview.net/forum?id=YJ7o2wetJ2>.
- Suraj Nair, Aravind Rajeswaran, Vikash Kumar, Chelsea Finn, and Abhinav Gupta. R3m: A universal visual representation for robot manipulation. In *6th Annual Conference on Robot Learning*.
- Seohong Park, Oleh Rybkin, and Sergey Levine. Metra: Scalable unsupervised rl with metric-aware abstraction. *arXiv preprint arXiv:2310.08887*, 2023.
- Seohong Park, Tobias Kreiman, and Sergey Levine. Foundation policies with hilbert representations. In *Forty-first International Conference on Machine Learning*, 2024. URL <https://openreview.net/forum?id=LhNsSaAKub>.
- Xue Bin Peng, Yunrong Guo, Lina Halper, Sergey Levine, and Sanja Fidler. Ase: Large-scale reusable adversarial skill embeddings for physically simulated characters. *ACM Transactions On Graphics (TOG)*, 41(4):1–17, 2022.

- Matteo Pirota, Andrea Tirinzoni, Ahmed Touati, Alessandro Lazaric, and Yann Ollivier. Fast imitation via behavior foundation models. In *NeurIPS 2023 Foundation Models for Decision Making Workshop*, 2023.
- Martin L Puterman. *Markov decision processes: discrete stochastic dynamic programming*. John Wiley & Sons, 2014.
- Max Schwarzer, Ankesh Anand, Rishab Goel, R Devon Hjelm, Aaron Courville, and Philip Bachman. Data-efficient reinforcement learning with self-predictive representations. *arXiv preprint arXiv:2007.05929*, 2020.
- Harshit Sikchi, Siddhant Agarwal, Pranaya Jajoo, Samyak Parajuli, Caleb Chuck, Max Rudolph, Peter Stone, Amy Zhang, and Scott Niekum. Rl zero: Zero-shot language to behaviors without any supervision. In *7th Robot Learning Workshop: Towards Robots with Human-Level Abilities*, 2024a.
- Harshit Sikchi, Qinqing Zheng, Amy Zhang, and Scott Niekum. Dual RL: Unification and new methods for reinforcement and imitation learning. In *The Twelfth International Conference on Learning Representations*, 2024b. URL <https://openreview.net/forum?id=xt9Bu66rqv>.
- Harshit Sikchi, Andrea Tirinzoni, Ahmed Touati, Yingchen Xu, Anssi Kanervisto, Scott Niekum, Amy Zhang, Alessandro Lazaric, and Matteo Pirota. Fast adaptation with behavioral foundation models. *arXiv preprint arXiv:2504.07896*, 2025.
- Yuval Tassa, Yotam Doron, Alistair Muldal, Tom Erez, Yazhe Li, Diego de Las Casas, David Budden, Abbas Abdolmaleki, Josh Merel, Andrew LeFrancq, Timothy P. Lillicrap, and Martin A. Riedmiller. Deepmind control suite. *CoRR*, abs/1801.00690, 2018. URL <http://arxiv.org/abs/1801.00690>.
- Chen Tessler, Yifeng Jiang, Erwin Coumans, Zhengyi Luo, Gal Chechik, and Xue Bin Peng. Maskedmanipulator: Versatile whole-body control for loco-manipulation. *arXiv preprint arXiv:2505.19086*, 2025.
- Sebastian Thrun and Anton Schwartz. Issues in using function approximation for reinforcement learning. In *Proceedings of the 1993 connectionist models summer school*, pp. 255–263. Psychology Press, 2014.
- Andrea Tirinzoni, Ahmed Touati, Jesse Farebrother, Mateusz Guzek, Anssi Kanervisto, Yingchen Xu, Alessandro Lazaric, and Matteo Pirota. Zero-shot whole-body humanoid control via behavioral foundation models. *arXiv preprint arXiv:2504.11054*, 2025.
- Emanuel Todorov, Tom Erez, and Yuval Tassa. Mujoco: A physics engine for model-based control. In *2012 IEEE/RSJ international conference on intelligent robots and systems*, pp. 5026–5033. IEEE, 2012.
- Ahmed Touati and Yann Ollivier. Learning one representation to optimize all rewards. *Advances in Neural Information Processing Systems*, 34:13–23, 2021.
- Ahmed Touati, Jérémy Rapin, and Yann Ollivier. Does zero-shot reinforcement learning exist? In *The Eleventh International Conference on Learning Representations*, 2023. URL [https://openreview.net/forum?id=MYEap\\_OcQI](https://openreview.net/forum?id=MYEap_OcQI).
- David Warde-Farley, Tom Van de Wiele, Tejas Kulkarni, Catalin Ionescu, Steven Hansen, and Volodymyr Mnih. Unsupervised control through non-parametric discriminative rewards. *arXiv preprint arXiv:1811.11359*, 2018.
- Jungdam Won, Deepak Gopinath, and Jessica Hodgins. Physics-based character controllers using conditional vaes. *ACM Transactions on Graphics (TOG)*, 41(4):1–12, 2022.
- Yifan Wu, George Tucker, and Ofir Nachum. The laplacian in rl: Learning representations with efficient approximations. *arXiv preprint arXiv:1810.04586*, 2018.

Yifan Wu, George Tucker, and Ofir Nachum. Behavior regularized offline reinforcement learning. *arXiv preprint arXiv:1911.11361*, 2019.

Denis Yarats, David Brandfonbrener, Hao Liu, Michael Laskin, Pieter Abbeel, Alessandro Lazaric, and Lerrel Pinto. Don’t change the algorithm, change the data: Exploratory data for offline reinforcement learning. *arXiv preprint arXiv:2201.13425*, 2022.

## A APPENDIX

### A.1 PROOF OF LEMMA 4.3

**Lemma A.1.** *Given MDP  $\bar{\mathcal{M}}$ , let  $\pi$  be any  $\mathcal{K}_V$ -Lipschitz valued policy,  $M^\pi$  be the successor measure for  $\pi$  and  $\bar{M}^\pi$  be the *corresponding successor measure on  $\bar{\mathcal{M}}$* ,  $\mathcal{L}_{RLDP}$  upper bounds the prediction error in successor measure,*

$$\mathbb{E}_{s,a \sim d^\pi, s^+ \sim \rho} [|M^\pi(s, a, s^+) - \bar{M}^\pi(\phi(s), a, \phi(s^+))|] \leq \frac{\mathcal{L}_{RLDP}}{1 - \gamma} \quad (9)$$

*Proof.* Lets begin with  $\mathbb{E}_{s,a \sim d^\pi} [|M^\pi(s, a, s^+) - \bar{M}^\pi(s, a, s^+)|]$ . For a fixed  $s^+$

$$\begin{aligned} \mathbb{E}_{s,a \sim d^\pi} [|M^\pi(s, a, s^+) - \bar{M}^\pi(s, a, s^+)|] &\leq \mathbb{E}_{s,a \sim d^\pi} |p(s' = s^+) - p(\phi(s') = \phi(s^+))| + \\ &\quad \gamma \mathbb{E}_{s,a \sim d^\pi} |\mathbb{E}_{s' \sim P(\cdot|s,a)} V^\pi(s') - \mathbb{E}_{\phi(s') \sim P(\cdot|\phi(s),a)} V^\pi(\phi(s'))| \\ &\leq \mathcal{L}_R + \gamma \mathbb{E}_{s,a \sim d^\pi} |\mathbb{E}_{s' \sim P(\cdot|s,a)} [V^\pi(s') - V^\pi(\phi(s'))]| + \\ &\quad \gamma \mathbb{E}_{s,a \sim d^\pi} |\mathbb{E}_{s' \sim P(\cdot|s,a), \phi(s') \sim P(\cdot|\phi(s),a)} [V^\pi(s') - V^\pi(\phi(s'))]| \\ &\leq \mathcal{L}_R + \gamma \mathbb{E}_{s,a \sim d^\pi} |\mathbb{E}_{s' \sim P(\cdot|s,a)} [V^\pi(s') - V^\pi(\phi(s'))]| + \\ &\quad \gamma \mathcal{K}_V \mathbb{E}_{s,a \sim d^\pi} D(\phi P(\cdot|s,a), P(\cdot|\phi(s),a)) \\ &\leq \mathcal{L}_R + \gamma \mathbb{E}_{s,a \sim d^\pi} |\mathbb{E}_{s' \sim P(\cdot|s,a)} [V^\pi(s') - V^\pi(\phi(s'))]| + \\ &\quad \gamma \mathcal{K}_V \mathbb{E}_{s,a \sim d^\pi} \mathcal{L}_d \\ &\leq \mathcal{L}_R + \gamma \mathbb{E}_{s,a \sim d^\pi} \mathbb{E}_{s' \sim P(\cdot|s,a)} |V^\pi(s') - V^\pi(\phi(s'))| + \\ &\quad \gamma \mathcal{K}_V \mathbb{E}_{s,a \sim d^\pi} \mathcal{L}_d \\ &\leq \mathcal{L}_R + \gamma \mathbb{E}_{s,a \sim d^\pi} |V^\pi(s) - V^\pi(\phi(s))| + \\ &\quad \gamma \mathcal{K}_V \mathcal{L}_d \\ &\leq \mathcal{L}_R + \gamma \mathbb{E}_{s,a \sim d^\pi} |M^\pi(s, a) - M^\pi(\phi(s), a, \phi(s^+))| + \\ &\quad \gamma \mathcal{K}_V \mathcal{L}_d \end{aligned}$$

This implies,  $(1 - \gamma) \mathbb{E}_{s,a \sim d^\pi} [|M^\pi(s, a, s^+) - \bar{M}^\pi(s, a, s^+)|] = \mathcal{L}_R + \gamma \mathcal{K}_V \mathcal{L}_d$  where  $\mathcal{L}_R = \mathbb{E}_{s,a \sim d^\pi} |p(s' = s^+) - p(\phi(s') = \phi(s^+))|$ .

Taking expectation under  $s^+ \sim \rho(s^+)$ ,

$$\begin{aligned} (1 - \gamma) \mathbb{E}_{s,a \sim d^\pi, s^+ \sim \rho} [|M^\pi(s, a, s^+) - \bar{M}^\pi(s, a, s^+)|] &= \mathbb{E}_{s,a \sim d^\pi, s^+ \sim \rho} |p(s' = s^+) - p(\phi(s') = \phi(s^+))| + \gamma \mathcal{K}_V \mathcal{L}_d \\ &= \mathcal{L}_R + \gamma \mathcal{K}_V \mathcal{L}_d \end{aligned}$$

This implies,  $\mathbb{E}_{s,a \sim d^\pi, s^+ \sim \rho} [|M^\pi(s, a, s^+) - \bar{M}^\pi(s, a, s^+)|] = \frac{\mathcal{L}_R + \gamma \mathcal{K}_V \mathcal{L}_d}{1 - \gamma} = \frac{\mathcal{L}_{RLDP}}{1 - \gamma}$   $\square$

### A.2 PRIOR APPROACHES FOR REPRESENTATION LEARNING IN BFM'S

Prior work has often relied on complex objectives to enable learning of  $\phi$  and  $\psi$  for BFMs. Forward-Backward (FB) (Touati et al., 2023) combine learning the state representation,  $\phi$  with successor features,  $\psi$  and the policy.  $\phi$  and  $\psi$  are jointly learned to represent successor measures for a class of reward-optimal policies. FB alternates minimizing the successor measure loss below jointly for  $\psi$ ,  $\psi$  alongside policy improvement by optimizing Eq 5. FB uses the following loss minimizing Bellman residuals to learn representations:

$$\begin{aligned} \mathcal{L}(\phi, \psi) &= -\mathbb{E}_{s,a,s' \sim \rho} [\psi(s, a, z)^T \phi(s')] \\ &\quad + \frac{1}{2} \mathbb{E}_{s,a,s' \sim \rho, s^+ \sim \rho} [(\psi(s, a, z)^T \phi(s^+) - \gamma \bar{\psi}(s', \pi_z(s'), z)^T \bar{\phi}(s^+))] \quad (11) \end{aligned}$$

HILP (Park et al., 2024) learns state representation  $\phi$  that are suitable to predict value function for goal-reaching which is subsequently used for zero-shot RL in the same way as RLDP. HILP parameterizes the value function to be  $V(s, g) = \|\bar{\phi}(s) - \bar{\phi}(g)\|$  and then minimizes:

$$\mathcal{L}(\phi) = \mathbb{E}_{s, s', g \sim \rho} [\ell_{\tau}^2(-\mathbb{1}(s \neq g) - \gamma V(s', g) + V(s, g))] \quad (12)$$

where  $\ell_{\tau}^2$  is an expectile loss (Kostrikov et al. (2021)).

The Laplacian approach (Wu et al., 2018) learns state representation using eigenvectors of graph-Laplacian induced by a random-walk operator. The representation objective for Laplacian approach takes the following form:

$$\mathcal{L}(\phi) = \frac{1}{2} \mathbb{E}_{s \sim \rho, s' \sim P_{\pi}(\cdot|s)} [\|\phi(s) - \phi(s')\|_2^2] + \beta \mathbb{E}_{s, s' \in \rho} [\phi(s)^T \phi(s')] \quad (13)$$

### A.3 EXPERIMENTAL DETAILS

#### A.3.1 EXORL

ExoRL (Exploratory Offline Reinforcement Learning) is a benchmark suite that provides large, diverse offline datasets generated by exploratory policies across multiple domains (e.g., locomotion, manipulation, navigation). We consider three locomotion and one goal-based navigation environments – Walker, Quadruped, Cheetah, Pointmass – from the Deepmind Control Suite (Tassa et al. (2018)). For offline training, we use data provided from the EXORL benchmark trained using RND agent. These domains are explained further in table 4. All DM control tasks have an episode length of 1000.

| Domain    | Description            | Type          | Observation/Action Dimension | Tasks                                                                        | Reward |
|-----------|------------------------|---------------|------------------------------|------------------------------------------------------------------------------|--------|
| Walker    | two-legged robot       | Locomotion    | 24/6                         | stand<br>walk<br>run<br>flip                                                 | Dense  |
| Quadruped | four-legged robot      | Locomotion    | 78/12                        | jump<br>walk<br>run<br>stand                                                 | Dense  |
| Cheetah   | planar, 2D robot       | Locomotion    | 17/6                         | walk<br>run<br>walk backward<br>run backward                                 | Sparse |
| Pointmass | navigation in 2D plane | Goal-reaching | 4/2                          | reach top left<br>reach top right<br>reach bottom right<br>reach bottom left | Sparse |

**Table 4: ExoRL dataset summary.** *Domain* is the environment name in the ExoRL benchmark. *Description* is a natural language description of the agent embodiment/environment. *Type* is the broad task category. *Observation/Action Dimension* refers to the size of observation and action vectors from the environment. *Tasks* refers to the evaluation tasks provided by ExoRL. *Reward* refers to the density of non-zero reward signals from the environment.

#### A.3.2 SMPL 3D HUMANOID

SMPL (Skinned Multi-Person Linear Model) is a 3D parametric model of the human body that is widely used for character animation. It has a 358 dimensional proprioceptive observation space that includes body pose, rotation, and velocities. The action space is 69 dimensional where each action dimension lies in  $[-1, 1]$ . All episodes are of length 300.

#### A.3.3 D4RL

D4RL (Datasets for Deep Data-Driven Reinforcement Learning) (Fu et al. (2020)) is an offline RL benchmark suite built on the v2 Open AI Gym (Brockman et al. (2016)) that provides standardized



datasets and evaluation protocols across simulated and real-world tasks. We consider three simulated locomotion tasks – Hopper, HalfCheetah, Walker2D – and two datasets – medium and medium-expert. As described in Fu et al. (2020), the medium dataset is generated by online training a Soft-Actor Critic (Haarnoja et al. (2018)) agent, early-stopping the training, and collecting 1 million samples from this partially-trained policy. The “medium-expert” dataset is generated by mixing equal amounts of expert demonstrations and suboptimal data, generated via a partially trained policy or by unrolling a uniform-at-random policy. Further details about these tasks have been provided in table 5. Episodes have inconsistent length depending on termination/truncation with a maximum of 1000.

| Domain     | Task Name                 | # Samples       |
|------------|---------------------------|-----------------|
| Gym-MuJoCo | hopper-medium             | $10^6$          |
|            | hopper-medium-expert      | $2 \times 10^6$ |
|            | halfcheetah-medium        | $10^6$          |
|            | halfcheetah-medium-expert | $2 \times 10^6$ |
|            | walker2d-medium           | $10^6$          |
|            | walker2d-medium-expert    | $2 \times 10^6$ |

Table 5: Gym-MuJoCo tasks from D4RL.

#### A.4 REGULARIZED LATENT DYNAMICS PREDICTION

RLDP aims to learn a state representation encoder  $\phi$  such that latent state dynamics can be expressed as  $\phi(s') = g(\phi(s), a)^\top \mathbf{w}$  where  $g$  is a latent-state action encoder and  $\mathbf{w}$  are some constant weights.

##### A.4.1 ARCHITECTURE

The architecture of the RLDP encoder network is as pictured in figure 4

The state representation network  $\phi$  is a feedforward MLP with two hidden layers of 256 units that maps a state  $s$  to a  $d$ -dimensional embedding. In our default RLDP architecture, the action  $a$  is mapped to 256-dimensional space using linear network  $A$ . In this section, we make this distinction clear and use  $a$  to denote raw action input to the network and  $A$  to denote a projection of action as input to network. The outputs of these two networks are concatenated and passed through a feedforward neural network  $g$  that has two hidden layers of 512 units and a  $d$ -dimensional output. The output of the  $g$  network is projected to a hypersphere and then passed through a linear layer  $w$ . The final  $d$ -dimensional representations are spherically normalized again.

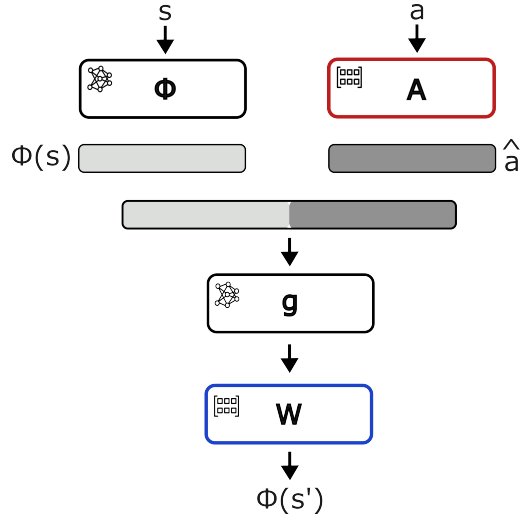

Figure 4: Architecture of RLDP network

During encoder training, the encoder map is unrolled to perform next latent state prediction from current latent state and action as  $\phi(s') = g(\phi(s), A)^\top \mathbf{w}$ . After encoder training, the encoder network is frozen. To obtain latent state embeddings, the states are passed through the state representation network to get  $\phi(s)$ . The encoder architecture for RLDP is kept consistent across all methods and datasets.

#### A.4.2 ABLATIONS

In this section, we aim to examine the components of the RLDP state encoder to understand which parts of the method are crucial to learn representations that can maximize the span of reward functions we can represent optimal policies for.

We pretrain state representation network  $\phi$  and policy using the ExoRL dataset generated with RND exploration policy and evaluate the performance in DMC environments cheetah, pointmass, quadruped, and walker.

##### Does orthogonality regularization matter?

Figure 5 shows the impact of changing orthogonality regularization while keeping a constant encoding horizon ( $H = 5$ ). The figure shows how the cosine similarity between latent states changes during encoder training for different regularization coefficients.

For a regularization coefficient  $\lambda = 0$ , the cosine similarity increases, indicating that all states are getting mapped to similar representations. For any regularization coefficient  $\lambda > 0$ , we observe that the cosine similarity follows a steep descent, indicating that the states are being mapped to diverse representations. These results indicate that adding even small orthogonality regularization can reduce representation collapse significantly.

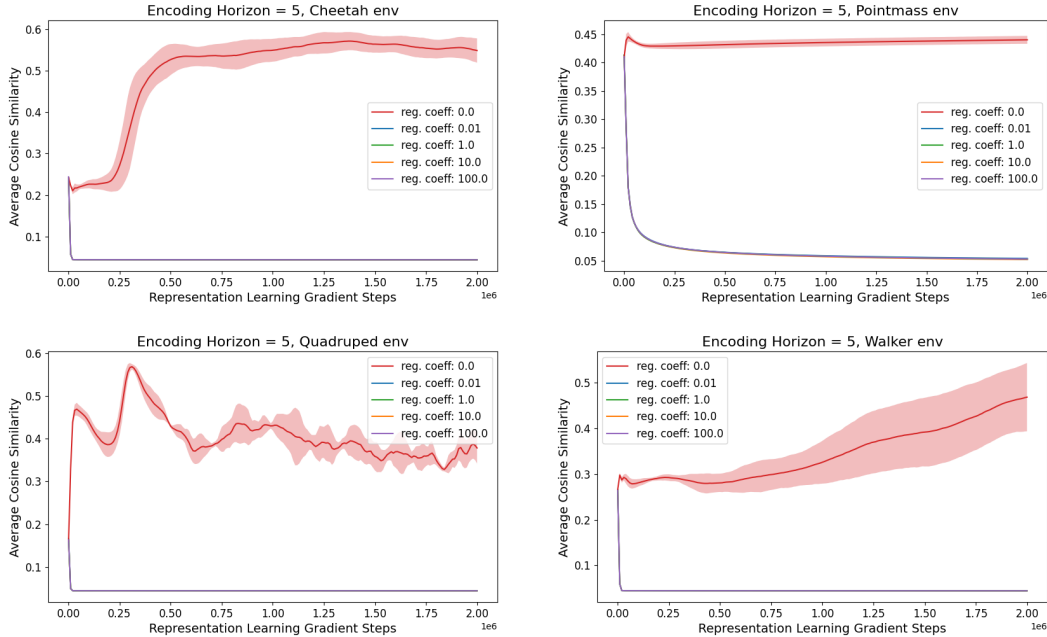

**Figure 5:** Evaluating the impact of Orthogonality Regularization on representations learned across four environments: Cheetah (top left), Pointmass (top right), Quadruped (bottom left), and Walker (bottom right).

##### How does encoding horizon impact performance?

As discussed in section 4, RLDP is trained with the objective to do latent next state prediction from latent current state and action. This prediction can be done multiple steps into the future latent states (6), depending to the choice of encoding horizon  $H$ .

In this section, we examine if the choice of encoding horizon impacts performance. To this end, we set the orthogonality regularization coefficient  $\lambda = 1.0$  and sweep over encoding horizon (1, 5, 10, 20).

The results are presented in figure 7. The average performance across environments is relatively stable with a small dip at  $H = 10$ , indicating that encoding horizon does not significantly impact performance. For our experiments, we use encoding horizon  $H = 1$  or  $H = 5$  depending on the setting. Specific encoding horizon setting for each experiment is discussed in section A.5. We do not choose higher encoding horizon  $H = 20$  despite comparable performance

in 7 because higher encoding horizon can result in slower encoder training. This is because each additional future state prediction involves a forward pass through the encoder network.

### What is important for the encoder architecture?

In this section, we aim to ablate components of the encoder map to understand which factors contribute to RLDP’s performance. For this setting, we fix encoding horizon  $H = 5$  and orthogonality regularization coefficient  $\lambda = 1.0$ .

We focus on two components of the encoder architecture – linear layer  $A$  and linear layer  $W$  (figure 4).

We compare the complete RLDP encoder network with its variations – a. *RLDP w/o SN* where  $W$  is replaced with an identity mapping; b. *RLDP w/o A* where  $A$  is replaced with an identity mapping; c. *RLDP w/o SN & A* where both  $W$  and  $A$  are replaced with an identity mapping.<sup>2</sup>

The results are shown in table 6. Although per-task results are variable, the full RLDP encoder delivered the strongest average performance on all four domains. Removing spherical normalization lowers returns and increases variance on most tasks and removing  $A$  also degrades performance. There are isolated wins for all variants, but these do not impact the domain-level results that favor the full RLDP encoder network. Thus, both  $SN$  and  $A$  contribute meaningfully to representation learning.

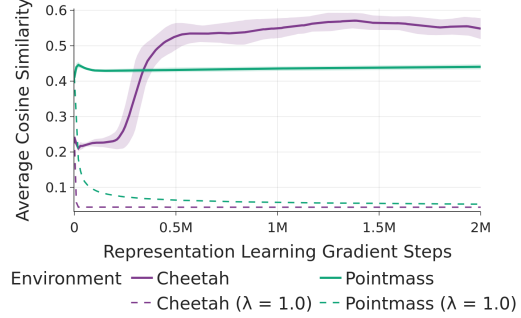

**Figure 6:** Average Cosine similarity between state-representations sampled uniformly from the training dataset: Feature similarity increases over the course of training when  $\lambda = 0.0$  and decreases when  $\lambda = 1.0$ . Shaded region shows standard deviation over 4 seeds

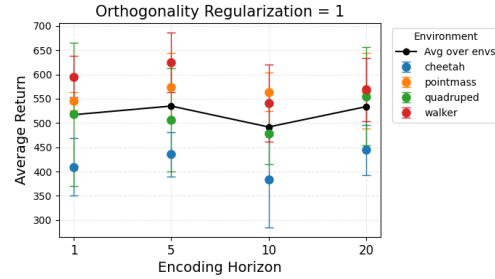

**Figure 7:** Evaluating the impact of Encoding Horizon

|           | Task          | RLDP                 | RLDP w/o SN          | RLDP w/o A           | RLDP w/o SN & A      |
|-----------|---------------|----------------------|----------------------|----------------------|----------------------|
| Walker    | Stand         | <b>890.40±27.33</b>  | 860.74±62.47         | 810.792±100.895      | 881.69±6.92          |
|           | Run           | <b>334.26±49.69</b>  | 324.04±6.73          | 290.779±26.520       | 276.30±47.21         |
|           | Walk          | <b>779.77±137.16</b> | 728.29±43.09         | 715.825±92.427       | 583.60±28.26         |
|           | Flip          | 492.94±22.79         | <b>501.59±45.04</b>  | 477.953±37.876       | 447.73±33.59         |
|           | Average(*)    | 624.34               | 603.66               | 573.837              | 547.33               |
| Cheetah   | Run           | <b>157.12±29.92</b>  | 84.99±67.31          | 115.25±14.13         | 118.67±32.67         |
|           | Run Backward  | 170.52±15.30         | <b>193.69±40.10</b>  | 192.20±42.07         | 156.56±45.98         |
|           | Walk          | <b>592.92±104.66</b> | 387.50±244.76        | 526.02±52.89         | 559.82±177.29        |
|           | Walk Backward | 821.51±50.62         | <b>838.12±145.37</b> | 836.29±173.10        | 668.46±186.17        |
|           | Average(*)    | 435.52               | 376.08               | 417.440              | 375.88               |
| Quadruped | Stand         | <b>794.94±43.25</b>  | 661.73±95.75         | 518.61±69.24         | 687.43±155.33        |
|           | Run           | 457.41±74.70         | 378.97±148.47        | 358.55±53.61         | <b>475.07±45.66</b>  |
|           | Walk          | 465.40±185.29        | 519.39±251.11        | 384.92±119.49        | <b>575.32±120.82</b> |
|           | Jump          | <b>733.32±55.30</b>  | 495.98±133.81        | 319.18±55.16         | 510.55±151.176       |
|           | Average(*)    | 612.77               | 514.02               | 395.34               | 562.09               |
| Pointmass | Top Left      | 890.41±60.79         | <b>892.13±41.74</b>  | 886.19±10.07         | 890.89±13.06         |
|           | Top Right     | 795.47±21.10         | 728.72±122.99        | <b>809.64±11.23</b>  | 797.59±19.44         |
|           | Bottom Left   | <b>805.17±20.44</b>  | 683.12±76.22         | 730.74±63.72         | 735.42±61.83         |
|           | Bottom Right  | 193.38±167.63        | 22.54±39.04          | <b>206.59±214.98</b> | 178.77±130.17        |
|           | Average(*)    | 671.11               | 515.02               | 547.617              | 583.78               |

**Table 6:** Study of encoder architecture. Cells show mean  $\pm$  std over 4 seeds; boldface indicates the highest mean per task.

<sup>2</sup>SN: Spherical Normalization on  $g$

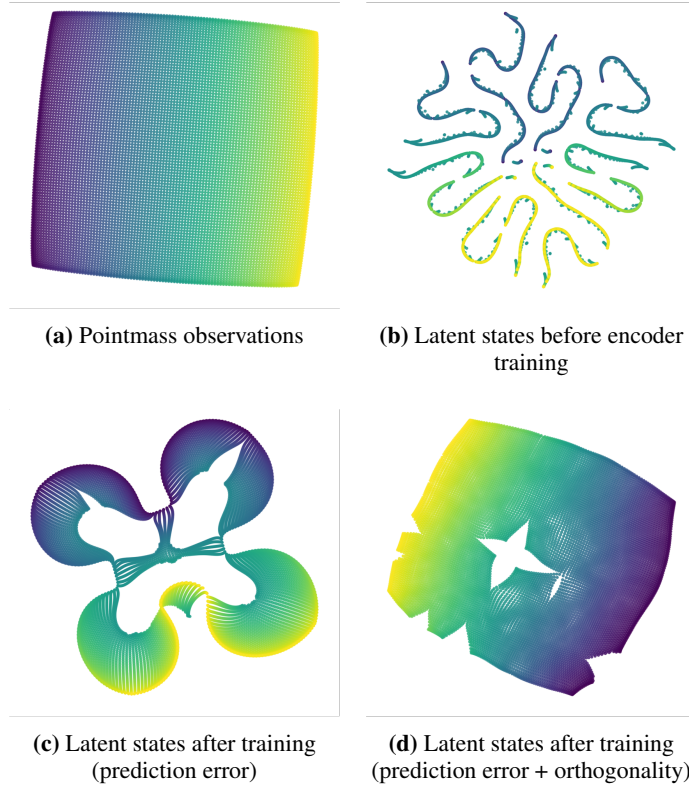

**Figure 8:** t-SNE visualizations of state features in Pointmass. Each panel shows the 2D projection of 10,000 uniformly sampled states.

#### A.4.3 WHAT DO THESE REPRESENTATIONS LOOK LIKE?

To qualitatively assess the learned state representations, we use the Pointmass environment, where we uniformly sampled 10,000 equidistant states from the underlying state space (figure 8 (a)).

We initialize a state representation encoder  $\phi$  and pass these states through the encoder to get latent embedding before training (figure 8 (b)).

We then train two encoders with different losses: a. we set  $\lambda = 0.0$  in 8 and train using only latent state prediction loss (figure 8 (c)); b. we set  $\lambda = 1.0$  in 8 and train using latent state prediction loss and orthogonality regularization

We project all these embeddings into two dimensions t-distributed Stochastic Neighbor Embedding (t-SNE). This visualization highlights the geometric structure captured by the representation and provides intuition about how the encoder organizes states in latent space.

The results in 8 show that training an encoder using only latent state prediction loss (figure (c)) is ineffective at capturing the layout of the environment and maps different states to similar latent representations. Using both latent state prediction loss and orthogonality regularization enables the encoder to better capture the environment layout (figure(d)).

#### A.4.4 FUTURE DIRECTIONS: EXTENSION TO REAL-WORLD EMBODIMENTS

RLDP presents a simple, stable and performant approach to train behavior foundation models in applications like robotics. An agent can be promptable to obtain low-level actions with such a BFM. Recent works (Tessler et al., 2025; Li et al., 2025) have made promising attempts to extend BFM algorithms to real-world domains and prior works have made it possible to prompt BFMs with language and videos (Sikchi et al., 2024a) which can be more intuitive interface for humans

than reward functions. We believe the simplicity of this method and stability across hyperparameter choices, as demonstrated in tables 6, 3, makes it a promising candidate for real-world embodiments.

## A.5 IMPLEMENTATION DETAILS

Here, we discuss the implementation details of all the methods and experiments described in the paper.

### A.5.1 OFFLINE ZERO-SHOT RL

We use the same architecture for forward and policy networks as presented in (Touati et al., 2023) for all representation learning methods.

The forward network  $F(s, a, z)$  has two parallel embedding layers that take in  $(s, a)$  and  $(s, z)$  independently using feedforward networks with a single hidden layer of 1024 units, projecting to 512 dimensions. Their outputs are concatenated and passed into two separate feedforward heads (each with one hidden layer of 1024 units), which output a  $d$ -dimensional vector.

The policy network  $\pi(s, z)$  has two parallel embedding layers that take inputs  $s$  and  $(s, z)$  and embeds them similar to the forward network (one hidden layer of 1024 units mapping to 512 dimensions). The outputs of the embedding layers are concatenated, and then passed into another single-hidden-layer feedforward network (1024 units) to produce an action vector of dimension  $d_A$ . A final Tanh activation ensures that actions lie in the space  $[-1, 1]^{d_A}$ .

#### For results in table 1:

For *RLDP*, we sweep over representation dimensions (64, 128, 256, 512, 1024) and report the results for the dimension that achieves the highest average performance across all tasks within each environment.

For *FB*, *PSM*, *HILP*, and *Laplacian*, we use the representation dimensions previously identified as optimal for each respective method.

#### For results in table 7:

For all methods, the backward representation network  $B(s)$  is implemented as a feedforward neural network with two hidden layers of 512 units each, mapping a state  $s$  to a 512-dimensional embedding.

### A.5.2 ONLINE ZERO-SHOT RL

Results for oracle baseline, FB-CPR, are taken from Tirinzoni et al. (2025), where the model was trained for 30M environment steps and averaged across five seeds.

For the offline representation learning methods (HILP, PSM, FB, RLDP), the backward representation network  $B(s)$  follows the architecture of the backward network of FB-CPR. It is a 2-layer MLP with 256 hidden dimension that maps a state  $s$  to a 256-dimensional embedding. We train this for 2 million timesteps on a dataset provided by Tirinzoni et al. (2025), which is generated by online training an FB-CPR agent for 30 million environment steps and saving the final 5 million steps. The RLDP representations are trained with encoding horizon 1.

We integrate the learned representation network into an FB-CPR agent to train the forward and policy networks. This training is performed online for 20 million environment steps where no updates are performed on the representation network.

### A.5.3 LOW COVERAGE DATASETS

For all offline representation learning methods (HILP, PSM, FB, RLDP), the backward representation network  $B(s)$  is a feedforward neural network with two hidden layers of 256 dimension that maps a state  $s$  to a 512-dimensional embedding. The RLDP representations are trained with encoding horizon 1.

The forward network  $F(s, a, z)$  and policy network  $\pi(s, z)$  follow the same architecture as FB. We introduce an additional loss term for training the policy network that resembles TD3+BC (Fujimoto & Gu, 2021). The policy improvement loss is defined as

$$\mathcal{L}_P(\pi_z) = -\lambda \psi(s, a, z)^\top z + (\pi_z(s) - a)^2 \quad (14)$$

where

$$\lambda = \frac{\alpha}{\frac{1}{N} \sum_{(s_i, a_i)} |Q(s_i, a_i)|}.$$

Following Fujimoto & Gu (2021), we set  $\alpha = 2.5$

## A.6 ZERO-SHOT RL

---

### Algorithm 1 ZERO-SHOT RL: PRETRAINING AND INFERENCE

---

**Require:** Offline dataset of trajectories  $\mathcal{D}$ .  
**Require:** Randomly initialized encoder  $\phi$ , successor-measure model  $\psi$ , actor  $\pi$ .  
**Require:** Representation-learning steps  $N_{\text{repr}}$ , total steps  $N$ .

- 1: **Part I: Pretraining (offline)**
- 2: **for** learning step  $n = 1, 2, \dots, N$  **do**
- 3:   **if**  $n \leq N_{\text{repr}}$  **then**
- 4:     Sample segment batch  $\tau = \{s_{0:H}^i, a_{0:H}^i\}_{i=1}^B \sim \mathcal{D}$
- 5:      $h_0^i = \phi(s_0^i), \quad h_{t+1}^i = g(h_t^i, a_t^i)^\top \mathbf{w}$
- 6:      $\mathcal{L}_d(\phi, g) = \mathbb{E}_{\tau^i \sim d^O} \left[ \left\| \sum_{t=1}^H h_t^i - \bar{\phi}(s_t^i) \right\|^2 \right]$
- 7:      $\mathcal{L}_r(\phi) = \mathbb{E}_{s, s' \sim \rho} [\phi(s)^\top \phi(s')]$
- 8:      $L(\phi) \leftarrow \mathcal{L}_d(\phi, g) + \lambda \mathcal{L}_r(\phi)$
- 9:      $\phi \leftarrow \phi - \alpha_\phi \nabla_\phi L(\phi)$
- 10:   **else**
- 11:     Sample transitions  $\{(s, a, s', \text{done})\} \sim \mathcal{D}$
- 12:     Sample  $z \sim \text{MixUniform} \{\text{mix random prior} + \text{goal-encoded}\}$
- 13:     **Policy Evaluation:**
- 14:      $L_{\text{zsrl}}(\psi)$  from Equation 10
- 15:      $\psi \leftarrow \psi - \alpha_\psi L_{\text{zsrl}}(\psi)$
- 16:     **Policy update:**
- 17:      $a \sim \pi(s, z)$
- 18:      $Q = \psi(s, a, z) \cdot z$
- 19:      $\pi \leftarrow \pi + \alpha_\pi \nabla_\pi Q(s, \pi(s, z))$
- 20:   **end if**
- 21: **end for**
- 22:
- 23: **Part II: Inference (reward-based task embedding)**
- Require:** Task specification for the test task (e.g., name, parameters).
- 24: Set up the task-specific reward function  $r_{\text{task}}(s)$  using the environment’s reward routine {e.g., via an environment constructor such as MAKEENV}
- 25: Sample transitions  $\{(s_i, a_i, s'_i)\}_{i=1}^N \sim \mathcal{D}$
- 26:  $z \leftarrow \frac{1}{N} \sum_i \phi(s'_i) r_{\text{task}}(s'_i)$

---

## A.7 ADDITIONAL RESULTS

This section details additional experiments we conducted to evaluate RLDP against baseline methods.



### A.7.1 OFFLINE ZERO-SHOT RL

In table 7, we provide results for RLDP representations and baseline methods trained on the same representation dimensionality ( $d = 512$ ). We have also included results for a reference baseline of a randomly initialized encoder that is frozen without any training.

Across all methods, using learned representations (FB, PSM, RLDP) outperforms random features, confirming that representation learning is crucial for zero-shot RL. Among learned methods, PSM and RLDP generally achieve the strongest performance.

|           | Task          | Random Features | FB                   | PSM                  | RLDP                 |
|-----------|---------------|-----------------|----------------------|----------------------|----------------------|
| Walker    | Stand         | 392.40±58.03    | <b>918.29±28.83</b>  | <b>899.54±30.73</b>  | <b>890.40±27.33</b>  |
|           | Run           | 75.39±20.97     | 381.31±17.32         | <b>450.57±28.95</b>  | 334.26±49.69         |
|           | Walk          | 193.84±112.98   | 779.29±63.60         | <b>875.61±33.44</b>  | <b>779.77±137.16</b> |
|           | Flip          | 132.02±67.85    | <b>977.08±2.76</b>   | 621.36±75.62         | 492.94±22.79         |
| Cheetah   | Run           | 31.82±36.88     | 129.39±37.63         | <b>181.85±54.17</b>  | <b>157.12±29.92</b>  |
|           | Run Backward  | 60.08±12.82     | 142.41±36.77         | <b>158.64±18.56</b>  | <b>170.52±15.30</b>  |
|           | Walk          | 147.52±155.66   | <b>604.54±80.51</b>  | 576.98±209.45        | <b>592.92±104.66</b> |
|           | Walk Backward | 272.77±42.40    | 630.40±144.23        | <b>817.92±98.86</b>  | <b>821.51±50.62</b>  |
| Quadruped | Stand         | 240.01±66.06    | 732.59±101.33        | 708.03±34.99         | <b>794.94±43.25</b>  |
|           | Run           | 114.19±30.22    | 425.15±52.02         | 404.32±23.26         | <b>457.41±74.70</b>  |
|           | Walk          | 137.65±47.57    | 492.91±17.55         | <b>523.94±52.13</b>  | <b>465.40±185.29</b> |
|           | Jump          | 190.62±46.63    | 567.27±48.90         | 549.57±15.86         | <b>733.32±55.30</b>  |
| Pointmass | Top Left      | 258.59±183.56   | <b>943.85±17.31</b>  | <b>924.20±10.64</b>  | <b>890.41±60.79</b>  |
|           | Top Right     | 216.30±189.05   | <b>550.84±282.41</b> | <b>666.00±133.15</b> | <b>795.47±21.10</b>  |
|           | Bottom Left   | 193.32±90.37    | <b>672.28±153.06</b> | <b>800.93±15.62</b>  | <b>805.17±20.44</b>  |
|           | Bottom Right  | 64.08±72.21     | 272.97±274.99        | <b>123.44±138.82</b> | <b>193.38±167.63</b> |

**Table 7:** Comparison (over 4 seeds) of zero-shot RL performance between using an untrained initialized encoder, FB, PSM, and RLDP with representation size  $d = 512$ . Bold indicates the best mean and any method whose mean plus one standard deviation overlaps with the best mean. Random features use representations from a randomly initialized encoder.

In table 8, we examine the impact of directly learning Universal Successor Features on top of RLDP representations. Typically for offline zero-shot RL on RLDP representations, we use loss equation 10 to update the critic network. To train USFAs, we use the following loss:

$$\mathcal{L}_{USFA}(\psi) = \mathbb{E}_{s,a,s' \sim \rho, s+\sim \rho} [(\psi(s, a, z) - [\phi(s) + \gamma \bar{\psi}(s', \pi_z(s'), z)])^2] \quad (15)$$

We find that across a wide range of control tasks, training a USFA module on top of RLDP’s state representations does not consistently outperform directly using successor measure loss 10 for policy evaluation. Critic learned using successor measure loss achieves overlapping-best performance on most Walker, Quadruped, and Pointmass tasks, while USFAs occasionally match or slightly exceed on certain Cheetah behaviors. Overall, these results indicate that RLDP’s learned representations capture most of the structure required for effective zero-shot generalization using either loss. The critic trained with successor measure loss typically achieves the strongest overall performance.

### A.7.2 ONLINE ZERO-SHOT RL

In table 9, we provide the full suite of results on 45 SMPL Humanoid task for all baseline methods, RLDP, and the oracle method FB-CPR. FB-CPR is an off-policy online unsupervised RL algorithm that introduces a latent conditional-discriminator in the form of Conditional-Policy Regularization to output policies close to an unlabeled demonstration dataset  $\mathcal{M}$ . The results for FB-CPR are as reported in Tirinzoni et al. (2025).

In figure 9, we summarize the results of RLDP representations with respect to baseline methods across all 45 tasks as reported in table 9 and figure 2. Positive values indicate tasks where RLDP achieves higher normalized returns. The median line, interquartile ranges, and interquartile mean (indicated by the gray diamond shape) across 45 tasks show that RLDP consistently outperforms FB, PSM, and HILP on average. The distribution widths further suggest that while RLDP yields better average performance, some tasks remain challenging, indicating room for further improvement in generalization.



|                  | Task          | RLDP                 | Learning USFAs on RLDP representations |
|------------------|---------------|----------------------|----------------------------------------|
| <b>Walker</b>    | Stand         | <b>890.40±27.33</b>  | 844.13±23.55                           |
|                  | Run           | <b>334.26±49.69</b>  | 293.50±40.40                           |
|                  | Walk          | <b>779.77±137.16</b> | 660.30±109.15                          |
|                  | Flip          | <b>492.94±22.79</b>  | <b>482.51±57.69</b>                    |
| <b>Cheetah</b>   | Run           | <b>157.12±29.92</b>  | 138.30±11.24                           |
|                  | Run Backward  | <b>170.52±15.30</b>  | <b>174.47±49.41</b>                    |
|                  | Walk          | <b>592.92±104.66</b> | <b>650.53±89.34</b>                    |
|                  | Walk Backward | <b>821.51±50.62</b>  | <b>723.10±224.30</b>                   |
| <b>Quadruped</b> | Stand         | <b>794.94±43.25</b>  | 537.15±206.87                          |
|                  | Run           | <b>457.41±74.70</b>  | <b>370.32±116.61</b>                   |
|                  | Walk          | <b>465.40±185.29</b> | <b>543.53±57.74</b>                    |
|                  | Jump          | <b>733.32±55.30</b>  | 536.26±128.89                          |
| <b>Pointmass</b> | Top Left      | <b>890.41±60.79</b>  | 773.63±49.11                           |
|                  | Top Right     | <b>795.47±21.10</b>  | 702.99±61.25                           |
|                  | Bottom Left   | <b>805.17±20.44</b>  | 740.06±45.06                           |
|                  | Bottom Right  | <b>193.38±167.63</b> | <b>133.05±62.88</b>                    |

**Table 8:** Comparison (over 4 seeds) of zero-shot RL performance when equation 10 is used to train the critic and when Universal Successor Features are trained on top of the state features. For fair comparison, we set RLDP representation dimension  $d = 512$  for both methods. Bold indicates the best mean and any method whose mean plus one standard deviation overlaps with the best mean.

Pairwise Performance Differences (RLDP vs Baselines)

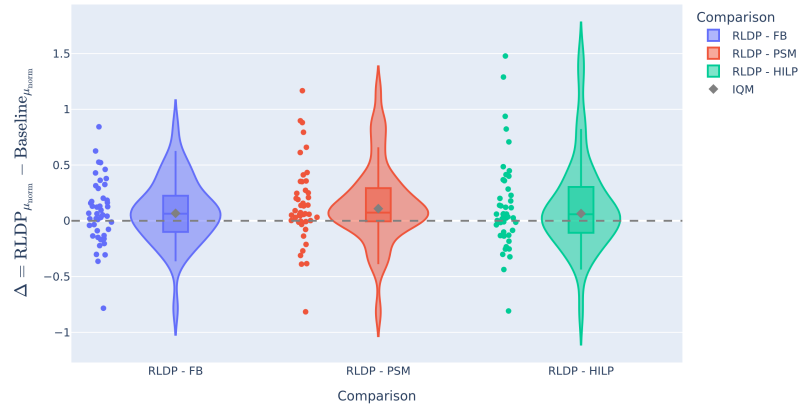

**Figure 9:** Comparing RLDP against prior offline representation learning methods using per-task normalized performance differences ( $\Delta = \text{RLDP} - \text{Baseline}$ ).

### A.7.3 ADDITIONAL RESULTS ON D4RL

We also test RLDP on D4RL medium-replay datasets, which have broader coverage than the datasets used in section 5.2. Based on the results as reported in table 10, we find RLDP to be competitive to the baselines methods.

### A.8 VISUALIZATIONS OF LEARNED SUCCESSOR MEASURES

We used a four room gridworld (as used in Touati & Ollivier (2021); Agarwal et al. (2024)) to plot the successor measures learned by RLDP. We

collect a dataset of all transitions and run RLDP with horizon 1 to learn representations  $\phi$ , successor features  $\psi$  and policy  $\pi$ . Note that any policy parameterized by latent  $z$  produces a successor measure parameterized by  $M^{\pi_z}(s, a, s^+) = \psi(s, a, z)^T \phi(s^+)$ . We have plotted the observed successor measures:  $M^{\pi_z}(s_0, a_0, s^+)$ , where we fix  $s_0$  and  $a_0$  for a few different  $z$  in figure 10. We

| Task                         | FB         | PSM         | HILP        | RLDP       |
|------------------------------|------------|-------------|-------------|------------|
| halfcheetah-medium-replay-v2 | 30.71±3.17 | 31.145±3.17 | 33.82±2.20  | 42.07±1.89 |
| hopper-medium-replay-v2      | 27.84±3.78 | 14.66±7.76  | 27.56±15.68 | 10.22±2.34 |
| walker2d-medium-replay-v2    | 24.94±2.13 | 27.47±4.58  | 39.02±8.89  | 34.15±6.77 |

**Table 10:** Normalized returns comparing FB, PSM, HILP, and RLDP on D4RL medium-replay datasets. Table shows mean  $\pm$  std. For medium-replay datasets, we find that no method significantly outperforms other methods.

| metric             | FB-CPR             | FB                                   | PSM                                 | HILP                                 | RLDP                                 |
|--------------------|--------------------|--------------------------------------|-------------------------------------|--------------------------------------|--------------------------------------|
| crawl-0.4-0-d      | 191.75 $\pm$ 43.60 | 26.06 $\pm$ 39.43                    | 38.38 $\pm$ 14.73                   | 52.31 $\pm$ 23.15                    | <b>86.48 <math>\pm</math> 45.87</b>  |
| crawl-0.4-0-u      | 101.76 $\pm$ 15.90 | 8.38 $\pm$ 9.01                      | 4.52 $\pm$ 7.47                     | 18.59 $\pm$ 20.42                    | <b>25.00 <math>\pm</math> 27.32</b>  |
| crawl-0.4-2-d      | 19.00 $\pm$ 4.00   | 3.05 $\pm$ 3.65                      | 6.52 $\pm$ 1.27                     | 8.97 $\pm$ 5.62                      | <b>11.21 <math>\pm</math> 4.72</b>   |
| crawl-0.4-2-u      | 15.02 $\pm$ 6.03   | 0.79 $\pm$ 1.07                      | 0.64 $\pm$ 0.82                     | <b>2.95 <math>\pm</math> 1.37</b>    | 2.76 $\pm$ 3.73                      |
| crawl-0.5-0-d      | 131.13 $\pm$ 64.97 | 43.27 $\pm$ 34.66                    | 46.17 $\pm$ 13.56                   | 52.41 $\pm$ 27.82                    | <b>55.82 <math>\pm</math> 18.40</b>  |
| crawl-0.5-0-u      | 101.92 $\pm$ 16.39 | 4.04 $\pm$ 5.87                      | 4.18 $\pm$ 4.83                     | <b>21.14 <math>\pm</math> 24.26</b>  | 20.22 $\pm$ 30.91                    |
| crawl-0.5-2-d      | 22.93 $\pm$ 5.31   | 4.14 $\pm$ 4.10                      | 5.64 $\pm$ 1.79                     | <b>8.64 <math>\pm</math> 4.21</b>    | 5.69 $\pm$ 2.18                      |
| crawl-0.5-2-u      | 15.81 $\pm$ 6.10   | 0.94 $\pm$ 0.99                      | 0.77 $\pm$ 0.70                     | 2.67 $\pm$ 1.03                      | <b>2.95 <math>\pm</math> 3.28</b>    |
| crouch-0           | 226.28 $\pm$ 28.17 | 55.12 $\pm$ 47.09                    | <b>92.70 <math>\pm</math> 60.86</b> | 72.94 $\pm$ 76.25                    | 4.83 $\pm$ 5.28                      |
| headstand          | 41.27 $\pm$ 10.20  | 0.00 $\pm$ 0.00                      | 0.00 $\pm$ 0.01                     | 0.11 $\pm$ 0.16                      | <b>2.63 <math>\pm</math> 1.99</b>    |
| jump-2             | 34.88 $\pm$ 3.52   | <b>29.08 <math>\pm</math> 3.76</b>   | 21.21 $\pm$ 11.60                   | 12.25 $\pm$ 14.05                    | 27.89 $\pm$ 1.66                     |
| lieonground-down   | 193.50 $\pm$ 18.89 | 35.41 $\pm$ 26.08                    | 63.87 $\pm$ 26.68                   | 69.79 $\pm$ 27.02                    | <b>74.69 <math>\pm</math> 30.03</b>  |
| lieonground-up     | 193.66 $\pm$ 33.18 | 20.83 $\pm$ 12.70                    | 13.92 $\pm$ 5.54                    | 30.81 $\pm$ 1.37                     | <b>54.38 <math>\pm</math> 31.06</b>  |
| move-ego-90-2      | 210.99 $\pm$ 6.55  | <b>207.47 <math>\pm</math> 9.92</b>  | 179.67 $\pm$ 49.64                  | 196.81 $\pm$ 40.36                   | 178.82 $\pm$ 45.10                   |
| move-ego-90-4      | 202.99 $\pm$ 9.33  | <b>161.84 <math>\pm</math> 12.65</b> | 102.35 $\pm$ 35.15                  | 102.98 $\pm$ 40.47                   | 99.96 $\pm$ 32.58                    |
| move-ego-0-0       | 274.68 $\pm$ 1.48  | 261.63 $\pm$ 1.76                    | 264.32 $\pm$ 1.95                   | <b>267.57 <math>\pm</math> 0.95</b>  | 178.92 $\pm$ 92.57                   |
| move-ego-0-2       | 260.93 $\pm$ 5.21  | 87.46 $\pm$ 21.99                    | 252.75 $\pm$ 15.03                  | <b>260.35 <math>\pm</math> 2.58</b>  | 250.92 $\pm$ 6.75                    |
| move-ego-0-4       | 235.44 $\pm$ 29.42 | 133.47 $\pm$ 33.86                   | <b>234.14 <math>\pm</math> 8.81</b> | 233.02 $\pm$ 14.75                   | 201.90 $\pm$ 38.55                   |
| move-ego-180-2     | 227.34 $\pm$ 27.01 | <b>232.14 <math>\pm</math> 20.35</b> | 141.56 $\pm$ 32.41                  | 139.12 $\pm$ 83.74                   | 222.83 $\pm$ 28.29                   |
| move-ego-180-4     | 205.54 $\pm$ 14.40 | <b>109.04 <math>\pm</math> 27.89</b> | 71.42 $\pm$ 19.98                   | 53.37 $\pm$ 25.65                    | 81.92 $\pm$ 29.90                    |
| move-ego-90-2      | 210.99 $\pm$ 6.55  | 217.16 $\pm$ 26.35                   | 214.64 $\pm$ 37.08                  | 178.96 $\pm$ 45.28                   | <b>221.43 <math>\pm</math> 33.90</b> |
| move-ego-90-4      | 202.99 $\pm$ 9.33  | 154.20 $\pm$ 41.82                   | 104.73 $\pm$ 20.95                  | 102.51 $\pm$ 63.37                   | <b>160.31 <math>\pm</math> 37.02</b> |
| move-ego-low-90-2  | 221.37 $\pm$ 35.35 | 75.28 $\pm$ 29.80                    | 76.96 $\pm$ 49.83                   | <b>126.80 <math>\pm</math> 80.76</b> | 30.15 $\pm$ 26.04                    |
| move-ego-low-0-0   | 215.61 $\pm$ 27.63 | 168.33 $\pm$ 5.95                    | 150.34 $\pm$ 62.07                  | <b>188.29 <math>\pm</math> 49.41</b> | 133.68 $\pm$ 52.10                   |
| move-ego-low-0-2   | 207.27 $\pm$ 58.01 | 82.66 $\pm$ 20.55                    | 73.60 $\pm$ 49.86                   | <b>104.77 <math>\pm</math> 23.00</b> | 66.84 $\pm$ 44.92                    |
| move-ego-low-180-2 | 65.20 $\pm$ 32.64  | <b>52.38 <math>\pm</math> 27.67</b>  | 46.28 $\pm$ 22.28                   | 43.90 $\pm$ 39.86                    | 28.71 $\pm$ 12.52                    |
| move-ego-low-90-2  | 222.81 $\pm$ 21.94 | <b>100.75 <math>\pm</math> 39.27</b> | 53.20 $\pm$ 21.26                   | 85.54 $\pm$ 82.04                    | 63.19 $\pm$ 42.99                    |
| raisearms-h-h      | 199.88 $\pm$ 42.03 | 192.49 $\pm$ 101.91                  | 94.64 $\pm$ 94.26                   | 171.41 $\pm$ 71.90                   | <b>217.09 <math>\pm</math> 34.35</b> |
| raisearms-h-l      | 167.98 $\pm$ 82.03 | <b>226.33 <math>\pm</math> 35.55</b> | 90.57 $\pm$ 68.37                   | 82.42 $\pm$ 43.38                    | 201.33 $\pm$ 87.51                   |
| raisearms-h-m      | 104.26 $\pm$ 81.69 | 100.49 $\pm$ 76.12                   | 61.82 $\pm$ 20.38                   | 112.16 $\pm$ 76.75                   | <b>155.36 <math>\pm</math> 85.85</b> |
| raisearms-l-h      | 243.16 $\pm$ 19.18 | <b>255.41 <math>\pm</math> 1.55</b>  | 128.56 $\pm$ 63.06                  | 136.49 $\pm$ 85.25                   | 233.82 $\pm$ 27.26                   |
| raisearms-l-l      | 270.43 $\pm$ 0.37  | 251.82 $\pm$ 9.70                    | <b>260.48 <math>\pm</math> 3.52</b> | 258.50 $\pm$ 6.07                    | 39.87 $\pm$ 34.16                    |
| raisearms-l-m      | 97.66 $\pm$ 81.17  | 135.05 $\pm$ 80.31                   | <b>254.91 <math>\pm</math> 3.78</b> | 91.49 $\pm$ 46.58                    | 217.42 $\pm$ 39.30                   |
| raisearms-m-h      | 75.05 $\pm$ 69.32  | 79.25 $\pm$ 31.99                    | 41.58 $\pm$ 13.58                   | <b>126.62 <math>\pm</math> 80.07</b> | 107.70 $\pm$ 79.18                   |
| raisearms-m-l      | 134.83 $\pm$ 70.28 | 218.22 $\pm$ 46.82                   | 173.28 $\pm$ 72.83                  | 155.21 $\pm$ 71.93                   | <b>220.67 <math>\pm</math> 50.89</b> |
| raisearms-m-m      | 87.25 $\pm$ 98.42  | 179.60 $\pm$ 74.63                   | 109.47 $\pm$ 91.62                  | 82.36 $\pm$ 38.59                    | <b>211.30 <math>\pm</math> 48.89</b> |
| rotate-x-5-0.8     | 2.29 $\pm$ 1.78    | 1.69 $\pm$ 2.32                      | 1.49 $\pm$ 1.43                     | 0.29 $\pm$ 0.18                      | <b>2.44 <math>\pm</math> 2.02</b>    |
| rotate-x-5-0.8     | 7.42 $\pm$ 5.69    | 2.55 $\pm$ 1.29                      | 0.53 $\pm$ 0.43                     | 0.32 $\pm$ 0.28                      | <b>6.43 <math>\pm</math> 3.15</b>    |
| rotate-y-5-0.8     | 199.08 $\pm$ 51.78 | 5.87 $\pm$ 3.63                      | 2.13 $\pm$ 2.17                     | 1.04 $\pm$ 0.11                      | <b>8.18 <math>\pm</math> 4.71</b>    |
| rotate-y-5-0.8     | 217.70 $\pm$ 43.67 | 4.86 $\pm$ 1.44                      | 1.58 $\pm$ 0.44                     | 0.89 $\pm$ 0.13                      | <b>14.03 <math>\pm</math> 12.12</b>  |
| rotate-z-5-0.8     | 124.95 $\pm$ 17.61 | 0.72 $\pm$ 0.79                      | 0.42 $\pm$ 0.30                     | 0.31 $\pm$ 0.23                      | <b>17.09 <math>\pm</math> 9.10</b>   |
| rotate-z-5-0.8     | 95.23 $\pm$ 15.75  | <b>1.71 <math>\pm</math> 1.67</b>    | 0.39 $\pm$ 0.37                     | 0.38 $\pm$ 0.22                      | 0.66 $\pm$ 0.76                      |
| sitonground        | 199.44 $\pm$ 22.15 | 5.88 $\pm$ 4.75                      | 27.39 $\pm$ 22.19                   | 26.12 $\pm$ 21.69                    | <b>97.88 <math>\pm</math> 34.91</b>  |
| split-0.5          | 232.18 $\pm$ 20.26 | 12.64 $\pm$ 14.48                    | 34.31 $\pm$ 32.98                   | <b>87.22 <math>\pm</math> 5.92</b>   | 55.50 $\pm$ 33.46                    |
| split-l            | 117.67 $\pm$ 61.27 | 6.80 $\pm$ 9.14                      | 6.12 $\pm$ 7.17                     | 6.13 $\pm$ 5.72                      | <b>13.02 <math>\pm</math> 16.90</b>  |

**Table 9:** Comparing (over 4 seeds) FB, PSM, HILP, RLDP performance on SMPL Humanoid. FB-CPR (online oracle baseline) results are from Tirinzoni et al. (2025). Bold indicates the best mean across methods.

have fixed  $s_0$  to the corner state and  $a_0$  to action: right. We have plotted the policy for visualizing the policy represent by  $z$ .

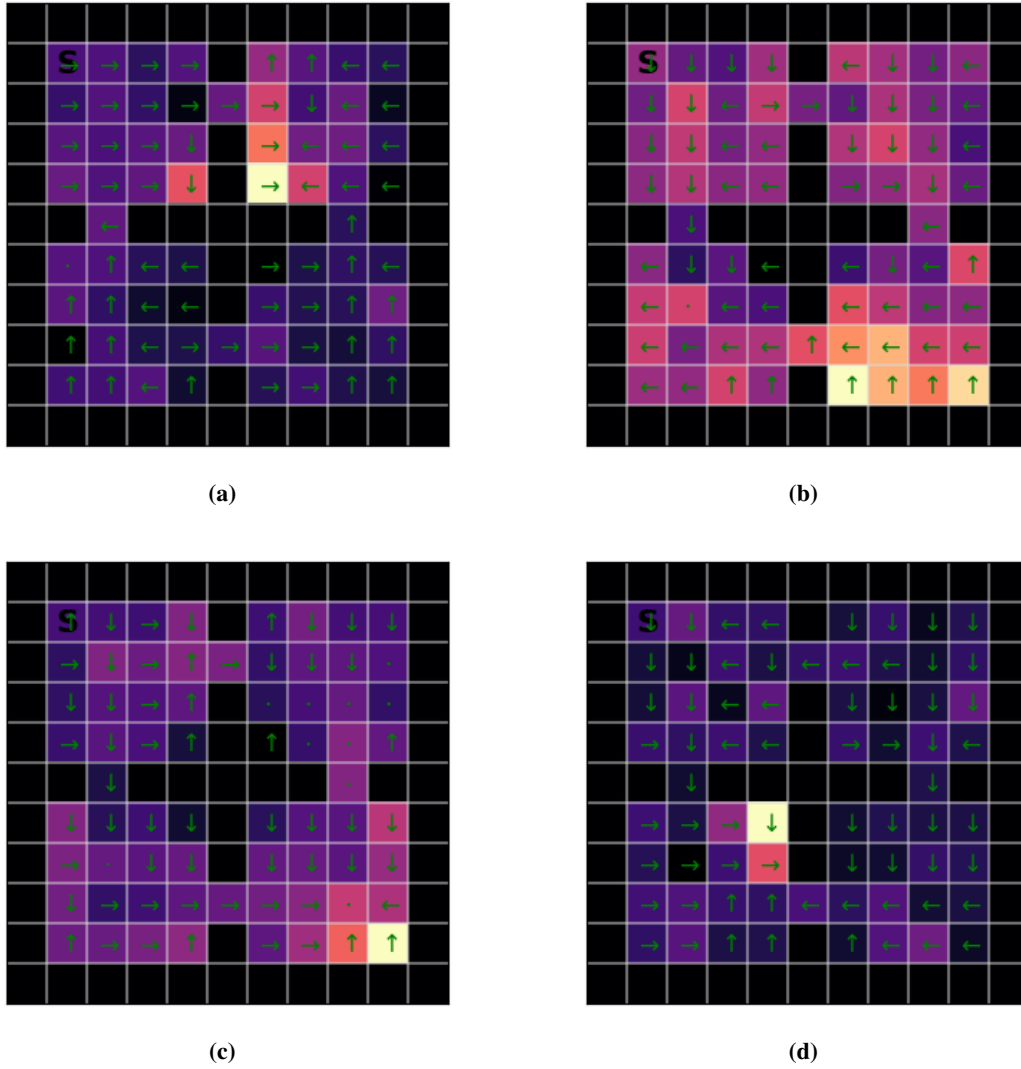

**Figure 10:** Visualization of successor measures  $M^{\pi_z}(s_0, a_0, s^+)$  for randomly sampled  $z$  (a) and (b); and goal-conditioned  $z$  (c) and (d).
